# Supplementary material
Source: PubMed Central journal article supplement (PMC6474799)
Supplement: NIHMS1517541-supplement-1.pdf [file NIHMS1517541-supplement-1.pdf]

# Error Processing and Inhibitory Control in Obsessive-Compulsive Disorder: A Meta-Analysis Using Statistical Parametric Maps

## *Supplementary Information*

### **Literature search methods**

There were no restrictions on the date of publication or language. Authors of foreign language papers were contacted for further details of their studies. Contacted authors were also welcomed to provide additional unpublished data, and searches included data published as conference abstracts in addition to data published in peer-reviewed journals, thus ensuring access to the largest possible selection of datasets. After removal of duplicates from the original search results, the titles were screened independently against the inclusion/exclusion criteria by two reviewers (L.J.N. and Y.L.). The full text was reviewed for remaining studies by L.J.N. and Y.L. against the inclusion/exclusion criteria, and data (sample sizes, % OCD medicated, symptom severity, gender ratio, age, task type, comorbidities, methods for assessing comorbidity, IQ, performance differences) were extracted from included studies independently by both reviewers. L.J.N. and Y.L. assessed all articles and achieved 100% agreement. Both L.J.N. and Y.L. are educated to PhD level.

### **Random-effects meta-analysis of behavioral performance**

For the analysis of task performance, 8 datasets provided RT measures of inhibitory control (1–8). This included conflict RT data (defined as incongruent RT - congruent RT) from 5 datasets (1–3, 5, 8), stop-signal reaction time (SSRT) data from two datasets (4, 6), and anti-saccade reaction time data for one dataset (7). In addition, inhibitory control error rates were available from 9 datasets (1–9), while congruent/go error rates were available from 6 datasets

(1–5, 8). The Go No/Go task does not provide a relevant RT measure of inhibitory control, and therefore the Hough dataset was excluded from this analysis (9). One dataset did not report separate error rates for incongruent and congruent trials. Moreover, in this study reported mean RT was collapsed across both trial types, which prevented the calculation of conflict RT or similar RT measures of inhibitory control (10). It was therefore excluded from these analyses.

### Anisotropic effect-size version of the seed-based *d* mapping (AES-SDM)

Unthresholded whole-brain t-maps were converted into a common Montreal Neurological Institute (MNI) stereotaxic space (voxel size: 2x2x2 mm<sup>3</sup>), and converted subsequently into effect-size and effect-size variance maps. For within-group maps, effect sizes were calculated for each voxel using the following formula, where  $y$  is the effect size,  $J$  is the exact form of the Hedge correction factor (see (11)),  $df$  is the degrees of freedom,  $n$  is sample size and  $t$  is the t-score at each voxel.

$$y_i = J(df_i) \times \sqrt{\frac{1}{n_i}} \times t_i$$

For between-group maps, effect sizes were calculated using the following formula, where  $n_1$  is sample size of the patient group and  $n_2$  is sample size of the control group.

$$y_i = J(df_i) \times \sqrt{\frac{1}{n_{i,1}} + \frac{1}{n_{i,2}}} \times t_i$$

Including original t-maps rather than data extracted from peak coordinates substantially increases the sensitivity of voxel-based fMRI meta-analyses (12). Where original statistical maps were unavailable, cluster peak coordinates and t-scores were used to recreate effect-size and effect-size variance maps where the effect-size of non-peak voxels was estimated

using an anisotropic unnormalized Gaussian kernel in which voxels more correlated with the peak were assigned higher effect sizes (13). Positive and negative effect sizes were included in the same map, in order to correctly take into account between-study heterogeneity (e.g., opposing directional findings) in overlapping regions (14). Following this, a mean map was created by performing a voxel-wise calculation of the random-effects mean of the study maps, with each study weighted by the inverse of the sum of its variance plus the between-study variance meaning that studies with larger sample sizes or lower variability were more highly weighted. Effect-sizes at each voxel were converted into SDM-Z values. Assessment of statistical significance was performed using standard permutation testing, against the null hypothesis that BOLD response/group differences are the same throughout the brain. Specifically, null distributions were obtained by randomly permuting the location of voxels within the individual studies. We conducted 50 whole-brain permutations, corresponding to roughly 4,000,000 permuted meta-analytic voxel effect-sizes. We used the default voxel  $p$ -value threshold of  $p < 0.005$ . In addition, a cluster extent threshold of 80 voxels and a peak SDM-Z value threshold of  $> 2$  were used to reduce the false positive rate. For meta-regressions, we used the recommended threshold of  $p < .0005$ , and with only regions found in the main analysis included (14–16).

The effect size SDM method has been empirically validated by comparing its results with a mega-analysis of the individual data of the studies included in a meta-analysis (12). This validation showed ES-SDM to have a good overlap with the mega-analysis, with an adequate sensitivity and an excellent control of false positives. Moreover, AES-SDM has been used in 100 studies to date, and a number of previous studies have used this method to perform t-map based meta-analyses (17–20).

### Example syntax for PubMed database

(ocd AND error AND fmri [Title/Abstract]) OR ("obsessive compulsive disorder" AND error AND fmri [Title/Abstract]) OR ("obsessive compulsive disorder" AND error AND "functional magnetic resonance imaging" [Title/Abstract]) OR (ocd AND error AND "functional magnetic resonance imaging" [Title/Abstract]) OR (ocd AND errors AND fmri [Title/Abstract]) OR ("obsessive compulsive disorder" AND errors AND fmri [Title/Abstract]) OR ("obsessive compulsive disorder" AND errors AND "functional magnetic resonance imaging" [Title/Abstract]) OR (ocd AND errors AND "functional magnetic resonance imaging" [Title/Abstract]) OR (ocd AND inhibition AND fmri [Title/Abstract]) OR (ocd AND stop AND fmri [Title/Abstract]) OR (ocd "go no/go" AND fmri [Title/Abstract]) OR (ocd AND stroop AND fmri [Title/Abstract]) OR (ocd AND simon AND fmri [Title/Abstract]) OR (ocd AND flanker AND fmri [Title/Abstract]) OR (ocd AND "multi source interference " AND fmri [Title/Abstract]) OR ("obsessive compulsive disorder" AND inhibition AND fmri [Title/Abstract]) OR ("obsessive compulsive disorder" AND stop AND fmri [Title/Abstract]) OR ("obsessive compulsive disorder" AND "go no/go" AND fmri [Title/Abstract]) OR ("obsessive compulsive disorder" AND stroop AND fmri [Title/Abstract]) OR ("obsessive compulsive disorder" AND simon AND fmri [Title/Abstract]) OR ("obsessive compulsive disorder" AND flanker AND fmri [Title/Abstract]) OR ("obsessive compulsive disorder" AND "multi source interference" AND fmri [Title/Abstract]) OR (ocd AND inhibition "functional magnetic resonance imaging" [Title/Abstract]) OR (ocd AND stop AND "functional magnetic resonance imaging" [Title/Abstract]) OR (ocd "go no/go" AND "functional magnetic resonance imaging" [Title/Abstract]) OR (ocd AND stroop AND "functional magnetic resonance imaging" [Title/Abstract]) OR (ocd AND simon AND "functional magnetic resonance imaging" [Title/Abstract]) OR (ocd AND flanker AND "functional magnetic resonance imaging"[Title/Abstract]) OR (ocd AND "multi source interference" AND "functional magnetic resonance imaging" [Title/Abstract]) OR ("obsessive compulsive disorder" AND inhibition AND "functional magnetic resonance imaging" [Title/Abstract]) OR ("obsessive compulsive disorder" AND stop AND "functional magnetic resonance imaging" [Title/Abstract]) OR ("obsessive compulsive disorder" AND "go no/go" AND "functional magnetic resonance imaging" [Title/Abstract]) OR ("obsessive compulsive disorder" AND stroop AND "functional magnetic resonance imaging" [Title/Abstract]) OR ("obsessive compulsive disorder" AND simon AND "functional magnetic resonance imaging" [Title/Abstract]) OR ("obsessive compulsive disorder" AND flanker AND "functional magnetic resonance imaging" [Title/Abstract]) OR ("obsessive compulsive disorder" AND "multi source interference" AND "functional magnetic resonance imaging" [Title/Abstract]) OR (ocd AND stop AND fmri [Title/Abstract]) OR (ocd "go no/go" AND fmri [Title/Abstract]) OR (ocd AND stroop AND fmri [Title/Abstract]) OR (ocd AND simon AND fmri [Title/Abstract]) OR (ocd AND flanker AND fmri [Title/Abstract]) OR (ocd AND "multi source interference " AND fmri [Title/Abstract]) OR ("obsessive compulsive disorder" AND inhibition AND fmri [Title/Abstract]) OR ("obsessive compulsive disorder" AND stop AND fmri [Title/Abstract]) OR ("obsessive compulsive disorder" AND "go no/go" AND fmri [Title/Abstract]) OR ("obsessive compulsive disorder" AND stroop AND fmri [Title/Abstract]) OR ("obsessive compulsive disorder" AND simon AND fmri [Title/Abstract]) OR ("obsessive compulsive disorder" AND flanker AND fmri

[Title/Abstract]) OR ("obsessive compulsive disorder" AND "multi source interference" AND fmri [Title/Abstract]) OR (ocd AND inhibition "functional magnetic resonance imaging" [Title/Abstract]) OR (ocd AND stop AND "functional magnetic resonance imaging" [Title/Abstract]) OR (ocd "go no/go" AND "functional magnetic resonance imaging" [Title/Abstract]) OR (ocd AND stroop AND "functional magnetic resonance imaging" [Title/Abstract]) OR (ocd AND simon AND "functional magnetic resonance imaging" [Title/Abstract]) OR (ocd AND flanker AND "functional magnetic resonance imaging" [Title/Abstract]) OR (ocd AND "multi source interference" AND "functional magnetic resonance imaging" [Title/Abstract]) OR ("obsessive compulsive disorder" AND inhibition AND "functional magnetic resonance imaging" [Title/Abstract]) OR ("obsessive compulsive disorder" AND stop AND "functional magnetic resonance imaging" [Title/Abstract]) OR ("obsessive compulsive disorder" AND "go no/go" AND "functional magnetic resonance imaging" [Title/Abstract]) OR ("obsessive compulsive disorder" AND stroop AND "functional magnetic resonance imaging" [Title/Abstract]) OR ("obsessive compulsive disorder" AND flanker AND "functional magnetic resonance imaging" [Title/Abstract]) OR ("obsessive compulsive disorder" AND "multi source interference" AND "functional magnetic resonance imaging" [Title/Abstract]) OR ("obsessive compulsive disorder" AND inhibition "functional magnetic resonance imaging" [Title/Abstract]) OR ("obsessive compulsive disorder" AND inhibition "functional magnetic resonance imaging" [Title/Abstract]) OR (ocd AND inhibition AND fmri [Title/Abstract])

### Literature search results

Following duplicate removal, the initial search included a total of 268 papers and abstracts. Of these, 181 were excluded based on title and abstract review. Of the remaining studies, 72 were excluded following a full text review. Reasons included not using task-based fMRI (21–36), using a non-relevant fMRI task (37–48), papers were reviews or meta-analyses (16, 49–60), due to patient overlap with included studies (61–65), use of scanning parameters with very limited brain coverage (66, 67), or including no OCD-HC comparisons (68–70). One dataset was excluded as it examined patients who had undergone deep-brain stimulation (71). It was determined via correspondence with the authors as part of an earlier project (15, 16) that the studies by Nakao and colleagues (72–75) used substantially overlapping patient and control samples, and moreover that t-map data for these studies were not available.

Moreover, the accuracy rates were very high (98% in HC) and error trials were not modeled in the original analyses. Therefore, we did not re-contact these authors regarding this data for the present study. For one foreign language study (76), we did not receive a response to our correspondence regarding further details on the publication such as error rates and the potential availability of t-map data.

As the primary focus of the meta-analysis was on the error contrast, datasets with very few errors were also excluded (77–81). Specifically, studies which did not report an error contrast and which had high accuracy rates (e.g., > 95%) were examined closely on a case-by-case basis by YL and LJM, before a decision was made as to whether the authors should be contacted for unpublished data. In the study by Marsh et al (77), patients on average made less than one incongruent error and less than one congruent error. In Go/No-Go studies by Pena-Garijo (78) and Roth (79), patients made on average less than one Go error and less than one No-Go error. In a Stroop study by Schlosser (80), patients on average made less than one congruent error as well as an average of only one incongruent error. One 2005 study by Viard (81) and colleagues did not report error rates, and did not model errors as regressors in the original fMRI analysis. Moreover, given that the task contained only relatively few trials (32 incongruent, 32 congruent), that accuracy rates on this task are usually very high (82), and that the authors do not consider errors in their behavioral or fMRI analysis in the original manuscript (suggesting that their number may be trivial), we decided that this dataset would be unlikely to provide enough error trials to produce a viable error contrast.

Some datasets met our initial inclusion criteria, but were determined subsequently to be unavailable from the authors for inclusion in the current meta-analysis (83–87). For these

datasets, we provide full details on the sample demographics and fMRI findings below.

For one study containing a Simon task dataset and a go/no-go task dataset, errors were not modeled at the first-level in the analyses contained in the original paper. Instead errors were pooled into the implicit baseline (83). T-map data were not available. This study by Page and colleagues examined brain activation to correct incongruent trials versus correct congruent trials as well as correct no-go versus go trials in ten unmedicated male adults with OCD (mean age = 39.1 years, mean Y-BOCS = 23.5) and 11 male controls (mean age = 34.1). The authors found hypoactivation within temporo-parietal and cerebellar regions during the Simon task in patients with OCD. During the go/no-go task, patients showed hyperactivation in vmOFC, PCC and temporal lobe, but hypoactivation in rACC, basal ganglia, thalamus and cerebellum.

In one study by Morein-Zamir and colleagues (84), in which the authors examined brain activation abnormalities in 19 patients with OCD (14 males, 14 medicated, mean age = 37.8, Y-BOCS = 19.95) and 19 HC (14 males, mean age = 36.2) during a combined switch-go/no-go task, it was reported that patients showed hyperactivation in left occipital lobe and left caudate during correct response inhibition. It was determined after contacting the authors that the majority of subjects included in the original paper made no errors or else very few errors during this task, and that inclusion in the current analysis was therefore not feasible.

The paper by Kang and colleagues (85) used a stop task to study brain activation during successful stopping in 18 unmedicated adult patients with OCD (12 male, mean age = 24.9, mean Y-BOCS = 22.1) and 18 HC (12 male, mean age = 24.7). This study reports hypoactivation

in patients in rACC, pMFC, basal ganglia, temporal lobe and cerebellum, and hyperactivation in parietal lobe, parahippocampal gyrus and cerebellum, relative to HC.

In the paper by Maltby and colleagues, 14 adult patients with OCD (9 male, mean age = 39.36, mean Y-BOCS = 24.64) and 14 HC (mean age = 36.55) completed a go/no-go task. During errors, patients with OCD showed hyperactivation relative to HC within aI/fO, rACC, dACC, PCC and basal ganglia. During inhibitory control, patients showed relative hyperactivation in rACC, pMFC, PCC, dIPFC, basal ganglia and cerebellum.

In a stop task paper by Tolin and colleagues (87), 24 patients with OCD (18 males, 19 medicated, mean age = 33.54) showed hyperactivation in right fO and left aI/fO during errors, but hypoactivation in rACC during correct inhibitory control, relative to 24 HC (4 males, mean age = 51.29).



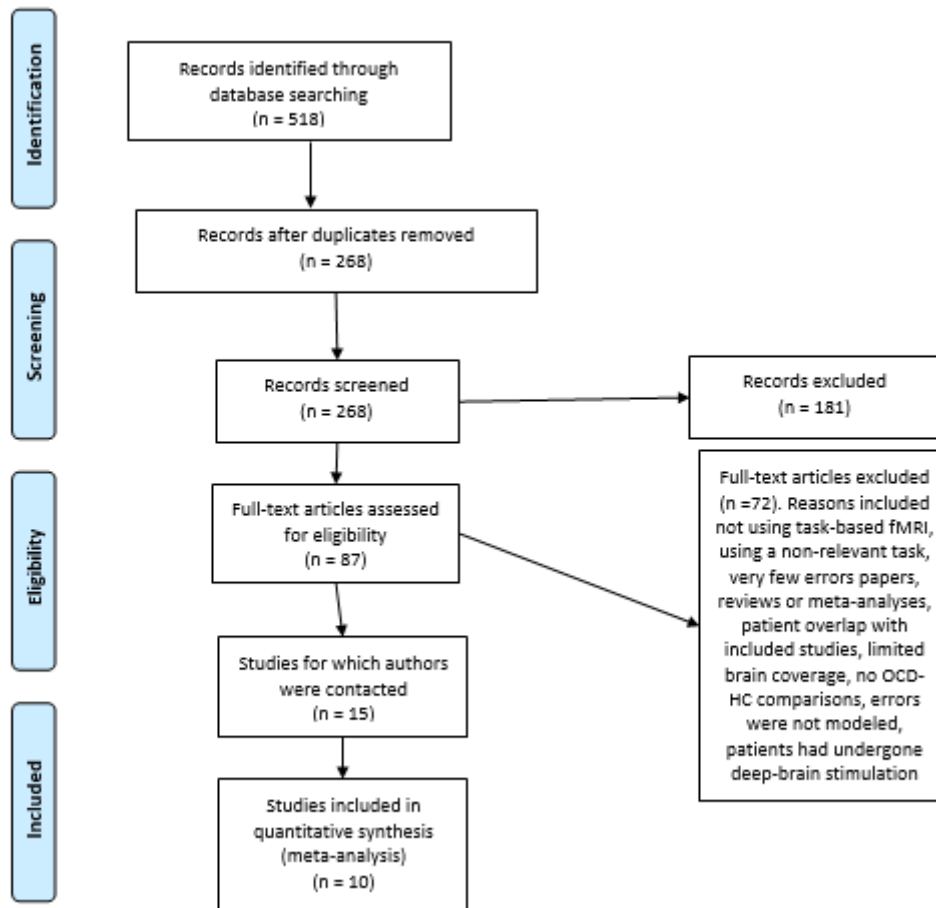

Supplementary Figure S1. PRISMA flow diagram summarizing the literature search.

**Supplementary Table S1. Current comorbid diagnoses in patients from 10 OCD fMRI datasets.**

| Study          | Clinical assessment | Anxiety disorders                                                                                                                                                                      | Mood disorders                                                    | Additional information                                                                                                                                                                                                                                                                                                                                                                                          |
|----------------|---------------------|----------------------------------------------------------------------------------------------------------------------------------------------------------------------------------------|-------------------------------------------------------------------|-----------------------------------------------------------------------------------------------------------------------------------------------------------------------------------------------------------------------------------------------------------------------------------------------------------------------------------------------------------------------------------------------------------------|
| Agam (7)       | SCID                | Generalized Anxiety Disorder: N=1 (4.8%),<br>Panic Disorder: N=1 (4.8%),<br>Posttraumatic Stress Disorder: N=1 (4.8%),<br>Social Phobia: N=4 (19.0%),<br>Specific Phobia: N=8 (38.1%). | Major Depressive Disorder: N=1 (4.8%),<br>Dysthymia: N=4 (19.0%). | Patients were excluded if they met diagnostic criteria for any comorbid psychiatric disorders except for anxiety and mood disorders.                                                                                                                                                                                                                                                                            |
| de Wit (4)     | SCID                | Panic Disorder: N=3 (7.31%),<br>Social Anxiety: N=5 (12.2%),<br>Specific Phobia: N=10 (24.39%).                                                                                        | Mood Disorders: N=9 (21.95%).                                     | Agoraphobia: N=1 (2.44%),<br>Eating Disorder: N=2 (4.88%),<br>Somatoform Disorder: N=1 (2.44%),<br>Tourette's Syndrome: N=1 (2.44%).<br><br>Patients were excluded if they had current or past diagnoses of psychosis                                                                                                                                                                                           |
| Fitzgerald (8) | K-SADS-PL           | Generalized Anxiety Disorder: N=12 (17.4%),<br>Panic Disorder: N=3 (4.4%),<br>Separation Anxiety Disorder: N=5 (7.2%),<br>Social Anxiety: N=5 (7.2%),<br>Specific Phobia: N=6 (8.7%).  | None                                                              | Attention Deficit Hyperactivity Disorder: N=9 (13.0%),<br>Developmental Coordination Disorder: N=1 (1.5%),<br>Impulse Control Disorder: N=4 (5.8%),<br>Tics: N=12 (17.4%),<br>Tourettes Syndrome: N=7 (10.1%).<br><br>Patients were excluded if they met diagnostic criteria for a major depressive disorder or if they had current or past diagnoses of autism spectrum, psychotic or substance use disorders. |
| Fitzgerald (2) | SCID                | None                                                                                                                                                                                   | None                                                              | Patients were excluded if they met diagnostic criteria for any comorbid psychiatric disorders.                                                                                                                                                                                                                                                                                                                  |
| Grutzmann (10) | SCID                | Anxiety Disorders: N=9 (45%).                                                                                                                                                          | Mood Disorders: N=2 (10%).                                        | Somatoform Disorder: N= 1 (5%)<br><br>Patients were excluded if they met diagnostic criteria for substance use disorder or if they had a current or past diagnosis of psychosis.                                                                                                                                                                                                                                |
| Hough (9)      | SCID                | Generalized Anxiety Disorder: N=2 (11.76%),<br>Panic Disorder: N=2 (11.76%),<br>Social Anxiety: N=4 (23.53%).                                                                          | None                                                              | Obsessive-Compulsive Personality Disorder: N=3 (17.65%).                                                                                                                                                                                                                                                                                                                                                        |

| Study      | Clinical assessment | Anxiety disorders                                                                                  | Mood disorders                                                                        | Additional information                                                                                                                             |
|------------|---------------------|----------------------------------------------------------------------------------------------------|---------------------------------------------------------------------------------------|----------------------------------------------------------------------------------------------------------------------------------------------------|
|            |                     |                                                                                                    |                                                                                       | Patients were excluded if they met diagnostic criteria for substance use disorder or if they had a current or past diagnosis of psychosis.         |
| Huysen (3) | ADIS-C/P            | Anxiety Disorders: N=12 (48%)                                                                      | Mood Disorders: N=3 (12%)                                                             | Externalizing Disorders: N=3 (12%)<br>Tics: 2 (8%)                                                                                                 |
| Rubia (6)  | MDI                 | None                                                                                               | None                                                                                  | Patients were excluded if they met diagnostic criteria for any comorbid psychiatric disorders.                                                     |
| Stern (1)  | SCID                | Panic Disorder: N = 5 (12.82%),<br>Social Anxiety: N =1 (2.56%),<br>Specific Phobia: N=5 (12.82%). | Depressive disorder not otherwise specified: N=6 (15.38%),<br>Dysthymia: N=1 (2.56%). | Patients were excluded if they met diagnostic criteria for current or past psychosis, bipolar spectrum mood disorders, or developmental disorders. |
| Yücel (5)  | SCID                | None                                                                                               | None                                                                                  | Patients were excluded if they met diagnostic criteria for any comorbid psychiatric disorders.                                                     |

*Abbreviations: ADIS-C/P, Anxiety Disorders Interview Schedule for Children for DSM-IV - Child and Parent Versions (88); K-SADS-PL, Kiddie-Schedule for Affective Disorders-Present and Lifetime Version (89); MDI, Maudsley Diagnostic Interview (90); SCID, Structured Clinical Interview for DSM-IV Axis-I Disorders (91).*

## Within-group findings

**HC errors.** HC showed significant activation to errors within bilateral al/fo/STL, pMFC sub-regions including dACC, SMA and pre-SMA, SMG/angular gyrus/STL, thalamus/brainstem and occipital lobe. Significant deactivation to errors was found in bilateral aLPFC/mOFC/frontal pole, caudate/thalamus, putamen (extending into PI in the right hemisphere), PCC/precuneus, postcentral/premotor cortex, DLPFC, MTL/STL and occipital lobe (Supplementary Table S1).

**OCD errors.** Patients with OCD showed significant activation to errors within bilateral al/fo/STL, dACC, SMA and pre-SMA, SMG/angular gyrus, thalamus/brainstem and occipital lobe, as well as right-lateralized DLPFC. Significant deactivation to errors was found in bilateral mOFC/frontal pole, caudate/thalamus, putamen, PCC/precuneus, premotor cortex/postcentral gyrus/SPL, DLPFC, left MTL/STL, left hippocampus/amygdala and right angular gyrus and occipital lobe (Supplementary Table S2).

**HC inhibitory control.** During inhibitory control, HC showed significant activation in bilateral al/fo/STL, dACC, SMA and pre-SMA, occipital lobe/SPL/precuneus/SMG/angular gyrus, premotor cortex, thalamus/caudate/brainstem, cerebellum and right DLPFC. Significant deactivation was observed in bilateral mOFC/frontal pole, precuneus/PCC, premotor cortex/postcentral gyrus/SMA, PI/STL, hippocampus and occipital lobe, as well as left DLPFC (Supplementary Table S3).

**OCD inhibitory control.** Patients with OCD had significant activation in bilateral al/fo/STL, DLPFC, dACC, SMA and pre-SMA, occipital lobe/precuneus/SPL/SMG, (ITL, premotor cortex, thalamus/brainstem and right caudate. Significant deactivation was found in mOFC/rACC/frontal pole, precuneus/PCC, and PI extending into STL on the right side (Supplementary Table S4).

**Supplementary Table S2. Meta-analysis results for fMRI studies of error-processing in HC.**

| Contrast                            | MNI x, y, z<br>Coordinates | Peak<br>SDM-Z | Peak<br>SMD | Mean<br>SMD | P Value    | No. of<br>Voxels | Brodmann<br>areas |
|-------------------------------------|----------------------------|---------------|-------------|-------------|------------|------------------|-------------------|
| <b>HC errors activation</b>         |                            |               |             |             |            |                  |                   |
| L aI/fO/STL                         | -48,16,-2                  | 7.815         | 0.6         | 0.35        | <0.0000001 | 1995             | 45/44/47/38       |
| L & R dACC/SMA/pre-SMA              | 0,34,32                    | 6.413         | 0.48        | 0.31        | <0.0000001 | 1912             | 32/24/8/9         |
| L & R occipital lobe                | 0,-82,18                   | 4.707         | 0.39        | 0.29        | <0.00001   | 2052             | 17/18/19          |
| R aI/fO/STL                         | 44,14,2                    | 6.392         | 0.47        | 0.33        | <0.0000001 | 1436             | 45/44/47/38       |
| R SMG/angular gyrus/STL             | 66,-40,28                  | 4.830         | 0.35        | 0.26        | <0.000005  | 639              | 40/22/42          |
| L & R thalamus/brainstem            | 4,-20,-10                  | 3.895         | 0.30        | 0.27        | <0.0001    | 651              |                   |
| L SMG/angular gyrus/STL             | -58,-46,30                 | 4.628         | 0.35        | 0.24        | <0.00001   | 506              | 40/22/42          |
| L aI/fO/STL                         | -40,-8,-12                 | 4.120         | 0.29        | 0.23        | <0.00005   | 95               |                   |
| <b>HC errors deactivation</b>       |                            |               |             |             |            |                  |                   |
| R postcentral/premotor cortex       | 26,-22,54                  | -4.207        | -0.31       | -0.22       | <0.000005  | 579              | 4/3/2/6           |
| R caudate/thalamus                  | 20,-20,26                  | -3.799        | -0.39       | -0.21       | <0.00005   | 493              |                   |
| L postcentral gyrus/premotor cortex | -28,-38,54                 | -3.937        | -0.25       | -0.21       | <0.00005   | 481              | 4/3/2/6/7         |
| R MTL/occipital lobe                | 44,-70,-2                  | -3.583        | -0.25       | -0.2        | <0.0001    | 441              | 37/18/19          |
| L DLPFC                             | -20,22,44                  | -4.866        | -0.33       | -0.25       | <0.0000005 | 411              | 9/8/46            |
| R putamen/PI                        | 30,-10,4                   | -4.599        | -0.35       | -0.26       | <0.000001  | 358              |                   |
| L & R aIPFC/mOFC/frontal pole       | -12,66,10                  | -3.623        | -0.27       | -0.21       | <0.0001    | 417              | 10/11             |

| Contrast                                 | MNI x, y, z<br>Coordinates | Peak<br>SDM-Z | Peak<br>SMD | Mean<br>SMD | P Value    | No. of<br>Voxels | Brodmann<br>areas |
|------------------------------------------|----------------------------|---------------|-------------|-------------|------------|------------------|-------------------|
| L & R paracentral lobule/premotor cortex | -4,-32,54                  | -3.678        | -0.26       | -0.22       | <0.00005   | 289              | 4/5               |
| L caudate/thalamus                       | -18,8,22                   | -4.795        | -0.35       | -0.23       | <0.0000005 | 190              |                   |
| L & R PCC/precuneus                      | 16,-46,36                  | -3.761        | -0.27       | -0.23       | <0.00005   | 168              |                   |
| R DLPFC                                  | 24,32,52                   | -3.52         | -0.34       | -0.27       | <0.0001    | 174              | 8/9               |
| R STL/MTL                                | 60,0,-8                    | -3.296        | -0.24       | -0.22       | <0.0005    | 166              | 22/21             |
| L occipital lobe                         | -30,-90,6                  | -3.19         | -0.22       | -0.19       | <0.0005    | 141              | 18/19             |
| L putamen                                | -28,-2,6                   | -3.809        | -0.28       | -0.23       | <0.00005   | 107              |                   |
| L MTL/STL                                | -62,-14,-8                 | -2.997        | -0.22       | -0.2        | <0.001     | 105              | 22/21             |

*Abbreviations: ai, anterior insula; aLPFC, anterior lateral prefrontal cortex; dACC, dorsal anterior cingulate cortex; DLPFC, dorsolateral prefrontal cortex; fO, frontal operculum; HC, healthy controls; MNI, Montreal Neurological Institute; mOFC, medial orbitofrontal cortex; MTL, middle temporal lobe; PCC, posterior cingulate cortex; pre-SMA; pre-supplementary motor area; PI, posterior insula; SDM, Seed-based d Mapping; SMA, supplementary motor area; SMD, standardized mean difference (Hedges' g); SMG, supramarginal gyrus; STL, superior temporal lobe.*

**Supplementary Table S3. Meta-analysis results for fMRI studies of error-processing in OCD.**

| Contrast                                       | MNI x, y, z<br>Coordinates | Peak SDM-Z | Peak SMD | Mean SMD | P Value    | No. of<br>Voxels | Brodmann areas |
|------------------------------------------------|----------------------------|------------|----------|----------|------------|------------------|----------------|
| <b>OCD errors activation</b>                   |                            |            |          |          |            |                  |                |
| L & R dACC/pre-SMA/SMA, R DLPFC                | 2,26,30                    | 9.402      | 0.72     | 0.41     | <0.0000001 | 2692             | 24,32,6,8,9    |
| L aI/fO/STL                                    | -38,24,-4                  | 7.609      | 0.62     | 0.4      | <0.0000001 | 1706             | 47,45,44,38    |
| R aI/fO/STL                                    | 48,10,-2                   | 7.004      | 0.51     | 0.36     | <0.0000001 | 1534             | 45,44,47,38    |
| L & R occipital lobe                           | -20,-72,6                  | 5.678      | 0.4      | 0.34     | <0.0000001 | 1379             | 17,18,19       |
| L & R thalamus/brainstem                       | 4,-26,0                    | 4.988      | 0.34     | 0.26     | <0.00001   | 684              |                |
| R SMG/angular gyrus                            | 60,-38,30                  | 5.224      | 0.36     | 0.28     | <0.0000001 | 568              | 40,42,22       |
| L SMG/angular gyrus                            | -58,-46,30                 | 5.733      | 0.43     | 0.28     | <0.0000001 | 567              | 40,42,22       |
| <b>OCD errors deactivation</b>                 |                            |            |          |          |            |                  |                |
| L & R premotor cortex/postcentral<br>gyrus/SPL | 24,-22,56                  | -4.819     | -0.3     | -0.22    | <0.000005  | 1585             | 6,4,3          |
| L precuneus/PCC                                | -12,-52,36                 | -4.374     | -0.3     | -0.26    | <0.00001   | 353              | 23             |
| L caudate/thalamus                             | -22,-26,24                 | -4.898     | -0.37    | -0.25    | <0.000001  | 306              |                |
| R DLPFC                                        | 24,32,42                   | -3.758     | -0.28    | -0.22    | <0.0001    | 328              | 9,8            |
| L DLPFC                                        | -28,22,48                  | -4.519     | -0.34    | -0.26    | <0.000005  | 287              | 8,9            |
| R putamen                                      | 24,8,4                     | -4.857     | -0.34    | -0.25    | <0.000005  | 239              |                |
| L putamen                                      | -24,6,4                    | -4.64      | -0.32    | -0.25    | <0.000005  | 228              |                |

| Contrast                | MNI x, y, z<br>Coordinates | Peak SDM-Z | Peak SMD | Mean SMD | P Value   | No. of<br>Voxels | Brodmann areas |
|-------------------------|----------------------------|------------|----------|----------|-----------|------------------|----------------|
| R caudate               | 18,8,22                    | -4.59      | -0.32    | -0.23    | <0.000005 | 163              |                |
| L MTL/STL               | -56,-8,-8                  | -4.543     | -0.31    | -0.22    | <0.000005 | 163              | 22,21          |
| L hippocampus/amygdala  | -26,-10,-22                | -3.602     | -0.25    | -0.19    | <0.0005   | 144              |                |
| L & R mOFC/frontal pole | 6,52,-10                   | -3.735     | -0.27    | -0.25    | <0.0001   | 137              | 11,10          |
| R occipital lobe        | 36,-84,14                  | -3.2       | -0.22    | -0.2     | <0.001    | 104              | 19,18          |

*Abbreviations: ai, anterior insula; dACC, dorsal anterior cingulate cortex; DLPFC, dorsolateral prefrontal cortex; fO, frontal operculum; MNI, Montreal Neurological Institute; MTL, middle temporal lobe; mOFC, medial orbitofrontal cortex; PCC, posterior cingulate cortex; pre-SMA, pre-supplementary motor area; OCD, obsessive-compulsive disorder; SDM, Seed-based d Mapping; SMA, supplementary motor area; SMD, standardized mean difference (Hedges' g); SMG, supramarginal gyrus; SPL, superior parietal lobe; STL, superior temporal lobe.*



**Supplementary Table S4. Meta-analysis results for fMRI studies of inhibitory control in HC.**

| Contrast                                             | MNI x, y, z<br>Coordinates | Peak SDM-Z | Peak SMD | Mean SMD | P Value    | No. of<br>Voxels | Brodmann<br>areas |
|------------------------------------------------------|----------------------------|------------|----------|----------|------------|------------------|-------------------|
| <b>HC inhibitory control activation</b>              |                            |            |          |          |            |                  |                   |
| L & R thalamus/caudate/<br>brainstem                 | -8,-8,10                   | 6.657      | 0.46     | 0.32     | <0.0000001 | 2085             |                   |
| R aI/fO/STL                                          | 34,18,8                    | 7.258      | 0.51     | 0.36     | <0.0000001 | 1031             | 44,45,47,38       |
| L & R SMA/pre-SMA/dACC                               | -4,14,58                   | 5.121      | 0.36     | 0.38     | <0.0000001 | 1108             | 6,32,24,8         |
| R SPL/SMG/angular gyrus/occipital lobe               | 42,-44,58                  | 5.535      | 0.39     | 0.4      | <0.0000001 | 950              | 2,7,40,19         |
| L occipital lobe/SPL/precuneus/<br>SMG/angular gyrus | -28,-72,36                 | 4.761      | 0.42     | 0.45     | <0.0001    | 787              | 19,7,40           |
| L aI/fO/STL                                          | -40,10,2                   | 5.962      | 0.4      | 0.39     | <0.0000001 | 590              | 45,47,38          |
| L premotor cortex                                    | -48,2,24                   | 4.985      | 0.42     | 0.39     | <0.00005   | 607              | 6                 |
| R premotor cortex                                    | 38,-8,62                   | 4.361      | 0.34     | 0.34     | <0.0005    | 374              | 6                 |
| R DLPFC                                              | 34,44,34                   | 5.129      | 0.34     | 0.29     | <0.0000001 | 81               | 46,9              |
| <b>HC inhibitory control deactivation</b>            |                            |            |          |          |            |                  |                   |
| L & R premotor cortex/postcentral<br>gyrus/SMA/PCC   | 28,-26,50                  | -4.089     | -0.27    | -0.18    | 0.000005   | 1174             | 6,4,23            |
| L & R mOFC/frontal pole                              | -2,56,-8                   | -4.118     | -0.28    | -0.17    | 0.000005   | 1223             | 10/11             |
| L & R precuneus/PCC                                  | -6,-52,20                  | -3.453     | -0.29    | -0.21    | 0.00005    | 432              | 30/29/23          |
| R PI/STL                                             | 40,-18,4                   | -3.035     | -0.22    | -0.21    | 0.0005     | 386              | 41/42             |

| Contrast         | MNI x, y, z<br>Coordinates | Peak SDM-Z | Peak SMD | Mean SMD | P Value | No. of<br>Voxels | Brodmann<br>areas |
|------------------|----------------------------|------------|----------|----------|---------|------------------|-------------------|
| L PI/STL         | -36,-18,8                  | -3.343     | -0.22    | -0.21    | 0.0001  | 239              | 41/42             |
| L hippocampus    | -24,-14,-20                | -3.778     | -0.25    | -0.17    | 0.00005 | 160              |                   |
| R STL            | 54,-26,8                   | -3.454     | -0.23    | -0.17    | 0.00005 | 176              | 22                |
| R hippocampus    | 26,-16,-20                 | -3.064     | -0.2     | -0.15    | 0.0005  | 113              |                   |
| L DLPFC          | -26,30,48                  | -3.061     | -0.2     | -0.19    | 0.0005  | 117              | 8,9               |
| R occipital lobe | 46,-74,28                  | -2.659     | -0.23    | -0.18    | 0.0001  | 94               | 19                |
| L occipital lobe | -40,-80,36                 | -3.481     | -0.26    | -0.23    | 0.00005 | 80               | 19                |

*Abbreviations: ai, anterior insula; dACC, dorsal anterior cingulate cortex; DLPFC, dorsolateral prefrontal cortex; fO, frontal operculum; HC, healthy controls; MNI, Montreal Neurological Institute; PCC, posterior cingulate cortex; pre-SMA, pre-supplementary motor area; PI, posterior insula; SDM, Seed-based d Mapping; SMA, supplementary motor area; SMD, standardized mean difference (Hedges' g); SMG, supramarginal gyrus; STL, superior temporal lobe.*

**Supplementary Table S5. Meta-analysis results for fMRI studies of inhibitory control in OCD.**

| Contrast                                   | MNI x, y, z<br>Coordinates | Peak SDM-Z | Peak SMD | Mean SMD | P Value    | No. of<br>Voxels | Brodmann areas |
|--------------------------------------------|----------------------------|------------|----------|----------|------------|------------------|----------------|
| <b>OCD inhibitory control activation</b>   |                            |            |          |          |            |                  |                |
| L aI/fO/premotor cortex/DLPFC              | -42,8,26                   | 7.224      | 0.5      | 0.37     | <0.0000001 | 1928             | 44,47,6,8      |
| R premotor cortex/IFG/DLPFC                | 38,2,40                    | 6.294      | 0.55     | 0.38     | <0.0000001 | 1684             | 6,44,45,8,     |
| R occipital lobe/precuneus/SPL/SMG         | 30,-60,38                  | 5.455      | 0.45     | 0.34     | <0.0000001 | 1666             | 19,7,2,40      |
| L occipital lobe/precuneus/SPL/SMG         | -26,-60,36                 | 4.075      | 0.46     | 0.4      | <0.0001    | 1254             | 19,7,2,40      |
| R aI/fO/STL                                | 38,16,-2                   | 4.485      | 0.32     | 0.26     | <0.00005   | 740              | 45,47,38       |
| L & R thalamus/brainstem, R caudate        | -6,-28,-4                  | 4.594      | 0.48     | 0.35     | <0.00005   | 721              |                |
| L & R SMA/pre-SMA/dACC                     | 8,24,38                    | 5.442      | 0.44     | 0.34     | <0.0000001 | 632              | 32,6,8,24      |
| R ITL/occipital lobe                       | 52,-62,-18                 | 4.326      | 0.29     | 0.39     | <0.00005   | 635              | 37,19,20       |
| L occipital lobe/ITL                       | -50,-68,-16                | 4.31       | 0.3      | 0.3      | <0.00005   | 235              | 37,19          |
| R caudate/thalamus                         | 12,-2,12                   | 4.273      | 0.3      | 0.27     | <0.00005   | 191              |                |
| <b>OCD inhibitory control deactivation</b> |                            |            |          |          |            |                  |                |
| L & R mOFC/rACC/frontal pole               | -2,56,-6                   | -5.33      | -0.35    | -0.24    | <0.0000001 | 1860             | 10,11,32,25    |
| L & R precuneus/PCC                        | -4,-54,20                  | -5.404     | -0.35    | -0.25    | <0.0000001 | 1533             | 23,30          |
| R PI/STL                                   | 48,-10,18                  | -4.403     | -0.34    | -0.28    | <0.00005   | 1144             | 42,22          |
| L DLPFC                                    | -24,24,42                  | -5.648     | -0.37    | -0.25    | <0.0000001 | 321              | 9,8            |
| R DLPFC                                    | 24,28,44                   | -4.516     | -0.32    | -0.21    | <0.00005   | 301              | 9,8            |

| Contrast                            | MNI x, y, z<br>Coordinates | Peak SDM-Z | Peak SMD | Mean SMD | P Value | No. of<br>Voxels | Brodmann areas |
|-------------------------------------|----------------------------|------------|----------|----------|---------|------------------|----------------|
| R premotor cortex/postcentral gyrus | 28,-28,60                  | -3.91      | -0.25    | -0.2     | <0.0005 | 229              | 6,4            |
| R angular gyrus/occipital lobe      | 54,-66,30                  | -4.174     | -0.28    | -0.22    | <0.0001 | 184              | 39,19          |
| L PI                                | -36,-16,6                  | -3.792     | -0.26    | -0.24    | <0.0005 | 125              |                |
| L angular gyrus/occipital lobe      | -46,-74,30                 | -3.524     | -0.31    | -0.24    | <0.0005 | 95               | 39,19          |

*Abbreviations: al, anterior insula; dACC, dorsal anterior cingulate cortex; DLPFC, dorsolateral prefrontal cortex; fO, frontal operculum; ITL, inferior temporal lobe; MNI, Montreal Neurological Institute; mOFC, medial orbitofrontal cortex; OCD, obsessive-compulsive disorder; PCC, posterior cingulate cortex; pre-SMA, pre-supplementary motor area; PI, posterior insula; SDM, Seed-based d Mapping; SMA, supplementary motor area; SMD, standardized mean difference (Hedges' g); SMG, supramarginal gyrus; SPL, superior parietal lobe; STL, superior temporal lobe.*

### Adult subgroup analysis

During errors, increased activation in right aI/fO (MNI  $x,y,z = 52,20,18$ , SDM- $Z = 2.934$ ,  $p < 0.001$ , voxels = 350) and aLPFC (MNI  $x,y,z = 24,52,12$ , SDM- $Z = 3.384$ ,  $p < 0.001$ , voxels = 87) remained significant in adult patients with OCD relative to controls. In addition, left fO hyperactivation was found in adult patients with OCD relative to HC (MNI  $x,y,z = -44,32,16$ , SDM- $Z = 2.686$ ,  $p = 0.0001$ , voxels = 141). Increased activation in SMA (MNI  $x,y,z = 0,8,46$ , SDM- $Z = 1.944$ ,  $p = 0.003$ , voxels = 13) and pre-SMA (MNI  $x,y,z = -6,34,60$ , SDM- $Z = 2.274$ ,  $p < 0.001$ , voxels = 16) in patients relative to HC remained but only at relaxed thresholds, most likely due to the reduced power in this sensitivity analysis relative to the primary analysis.

During inhibitory control, hyperactivation in left premotor cortex (MNI  $x,y,z = -26,2,60$ , SDM- $Z = 2.211$ ,  $p < 0.001$ , voxels = 224) as well as hypoactivation in right AI/fO/STL (MNI  $x,y,z = 54,4,-4$ , SDM- $Z = 3.010$ ,  $p < 0.001$ , voxels = 141) and bilateral thalamus (MNI  $x,y,z = 4,-10,14$ , SDM- $Z = 3.083$ ,  $p < 0.0003$ , voxels = 182) remained significant in adults with OCD relative to HC. Additional regions of hypoactivation in adult patients were found in right postcentral gyrus (MNI  $x,y,z = 40,-24,60$ , SDM- $Z = 3.136$ ,  $p < 0.001$ , voxels = 96), left postcentral gyrus (MNI  $x,y,z = -54,-16,20$ , SDM- $Z = 3.041$ ,  $p < 0.001$ , voxels = 100) and left cerebellum (MNI  $x,y,z = -6,-64,-22$ , SDM- $Z = 3.306$ ,  $p < 0.001$ , voxels = 139). Underactivation in rACC/vACC (MNI  $x,y,z = 14,40,18$ , SDM- $Z = 3.424$ ,  $p < 0.001$ , voxels = 67) and left caudate (MNI  $x,y,z = -16,6,22$ , SDM- $Z = 3.054$ ,  $p < 0.001$ , voxels = 24) remained significant in adult patients relative to controls only at a relaxed threshold.

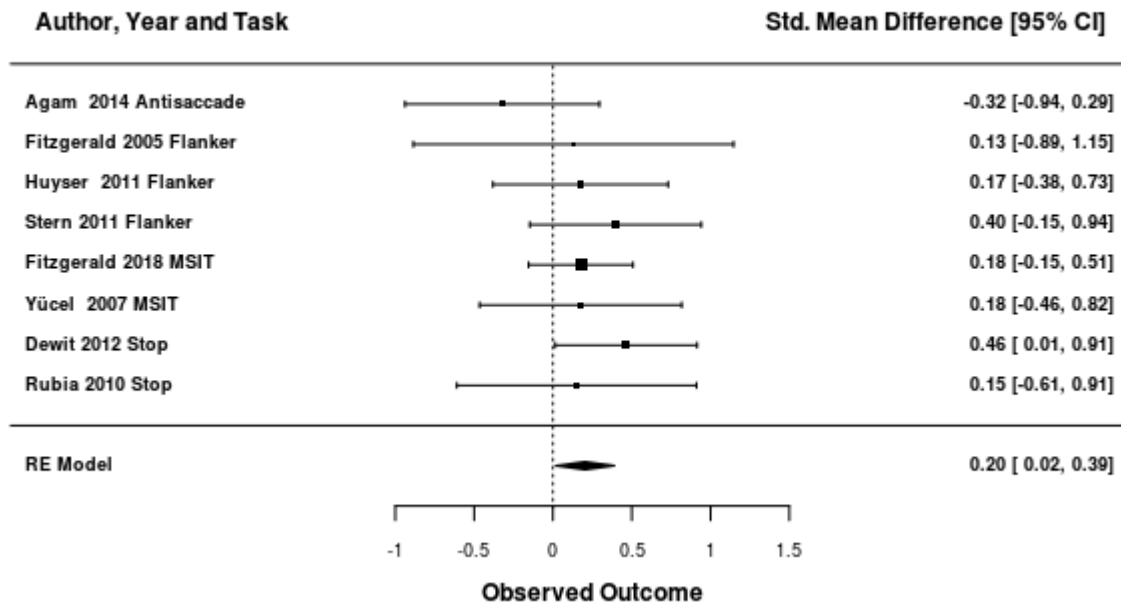

Supplementary Figure S2. Forest plot with standardized mean differences in reaction time measures of inhibitory control between patients with OCD and HC. CI, confidence interval; MSIT, multisource interference task; Std., standardized.

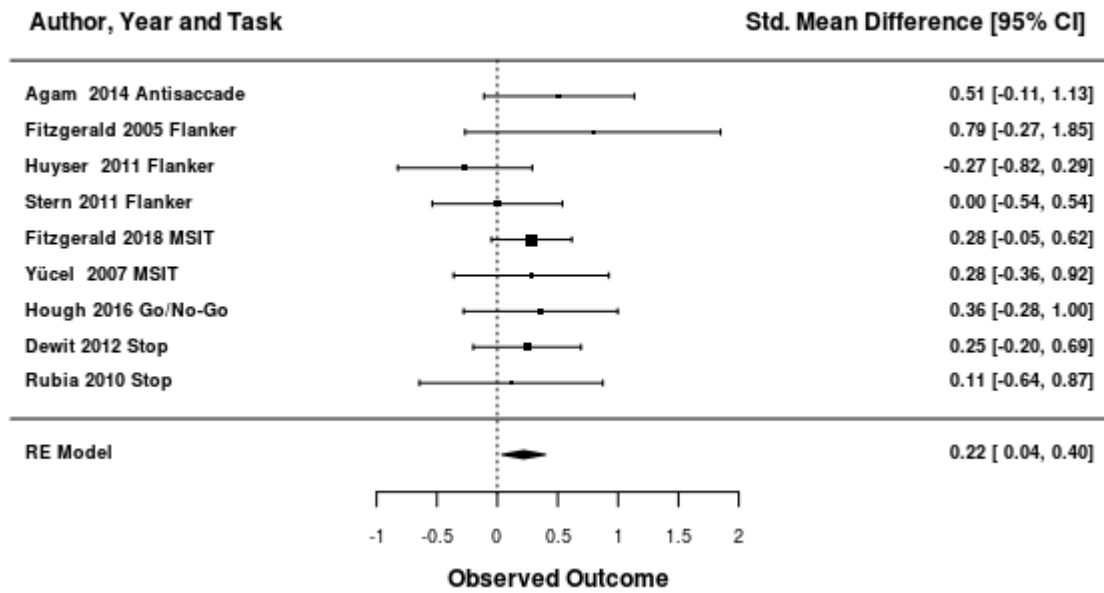

Supplementary Figure S3. Forest plot with standardized mean differences in inhibitory control error rates between patients with OCD and HC. CI, confidence interval; MSIT, multisource interference task; Std., standardized.

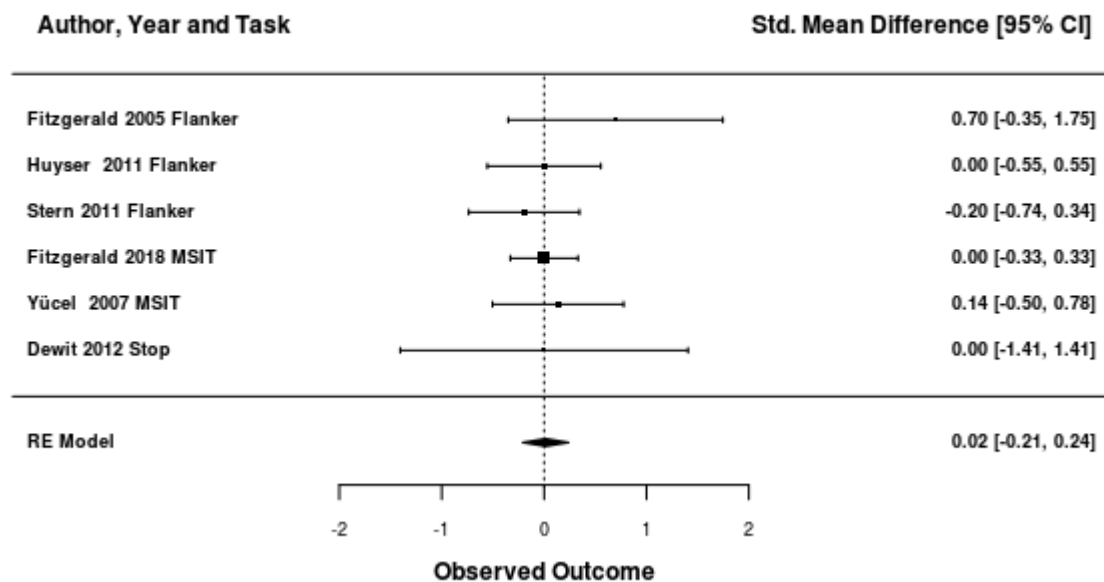

**Supplementary Figure S4. Forest plot with standardized mean differences in congruent/go error rates between patients with OCD and HC.** CI, confidence interval; MSIT, multisource interference task; Std., standardized.

### Forest plots for between-group brain findings

Cluster effect sizes and variances were extracted using the 'extract' function in AES-SDM ([www.sdmproject.com](http://www.sdmproject.com)), and plotted in forest plots. Importantly, the data contained in the plots were extracted from clusters that were already found to be significant in the whole-brain analyses. In addition, the plots are of average cluster effect sizes whereas AES-SDM performs separate analyses at each voxel. Therefore, these plots were produced only to illustrate the relative influence of each dataset in driving the significant between-group findings and do not themselves represent formal tests or exact representations of the tests performed in AES-SDM.



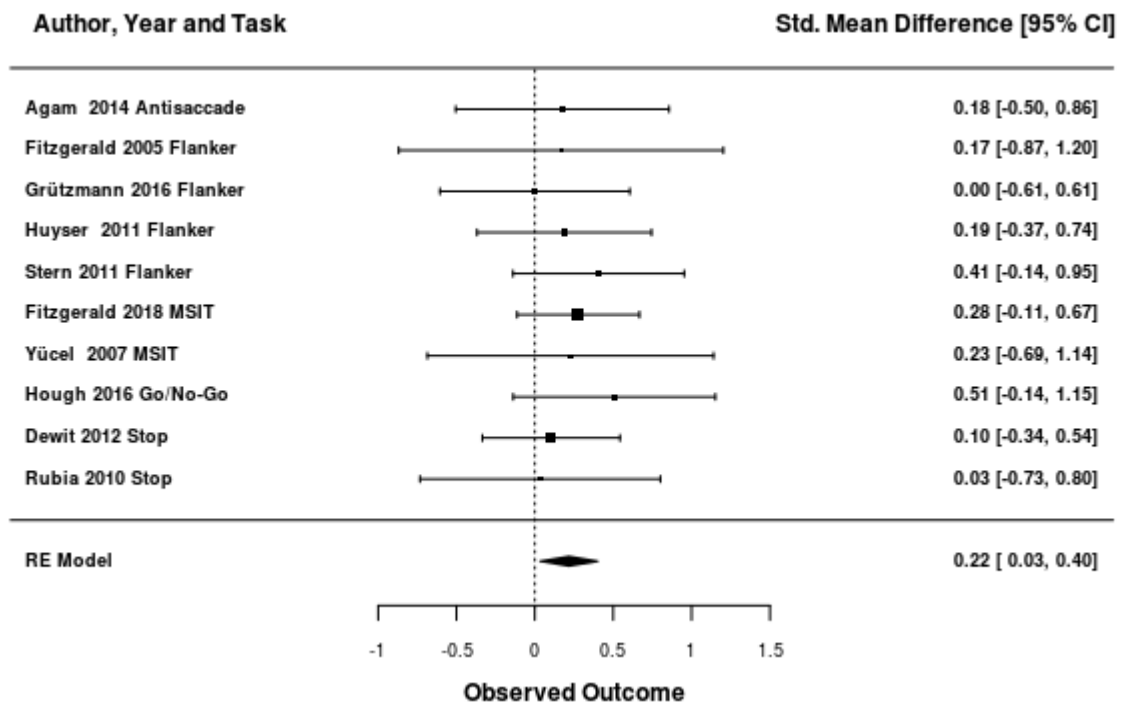

Supplementary Figure S5. Forest plot with standardized mean differences in brain activation during errors in right aI/fO (MNI x,y,z = 44,42,18) between patients with OCD and HC. CI, confidence interval; Std., Standardized.

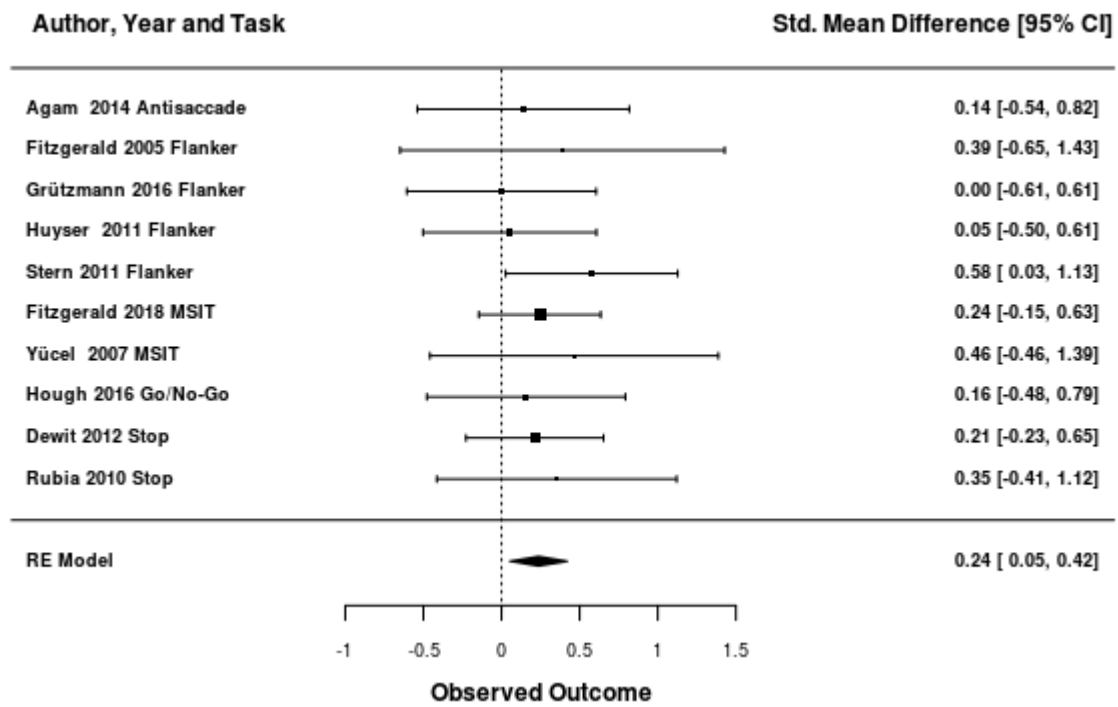

Supplementary Figure S6. Forest plot with standardized mean differences in brain activation during errors in right aLPFC (MNI x,y,z = 24,50,12) between patients with OCD and HC. CI, confidence interval; Std., Standardized.

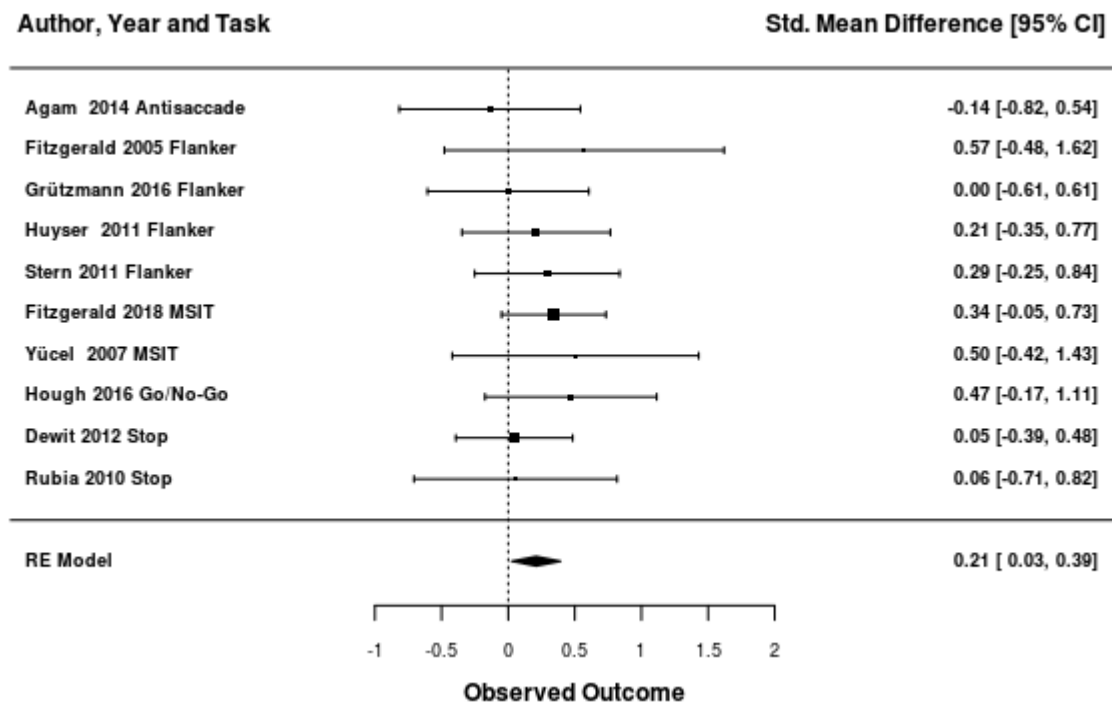

Supplementary Figure S7. Forest plot with standardized mean differences in brain activation during errors in bilateral pre-SMA/right premotor cortex (MNI x,y,z = 20,12,48) between patients with OCD and HC. CI, confidence interval; Std., Standardized.

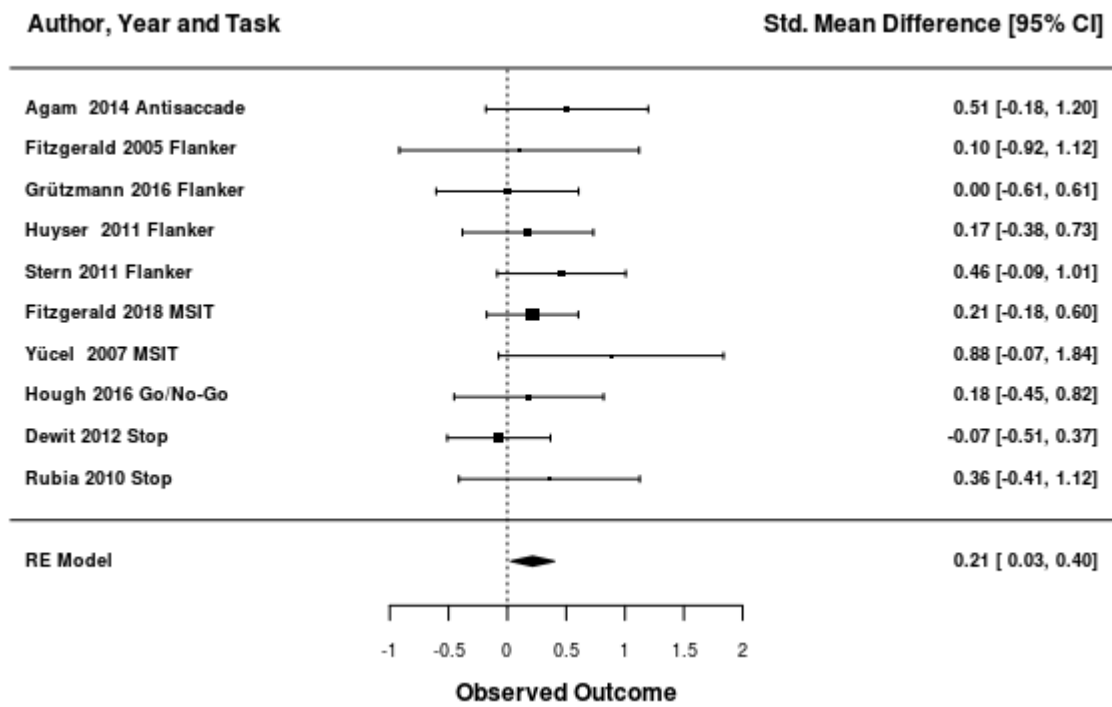

Supplementary Figure S8. Forest plot with standardized mean differences in brain activation during errors in dACC/SMA (MNI x,y,z =4,10,46) between patients with OCD and HC. CI, confidence interval; Std., Standardized.

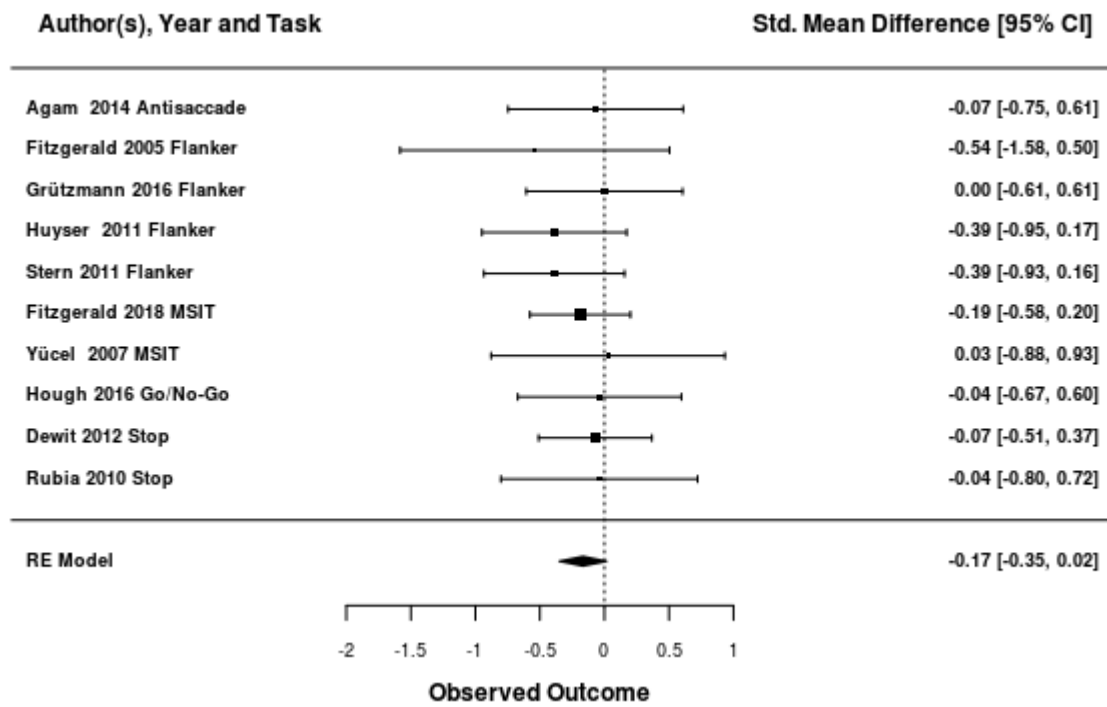

Supplementary Figure S9. Forest plot with standardized mean differences in brain activation during errors in L & R occipital lobe (MNI x,y,z = 10,-82,16) between patients with OCD and HC. CI, confidence interval; Std., Standardized.

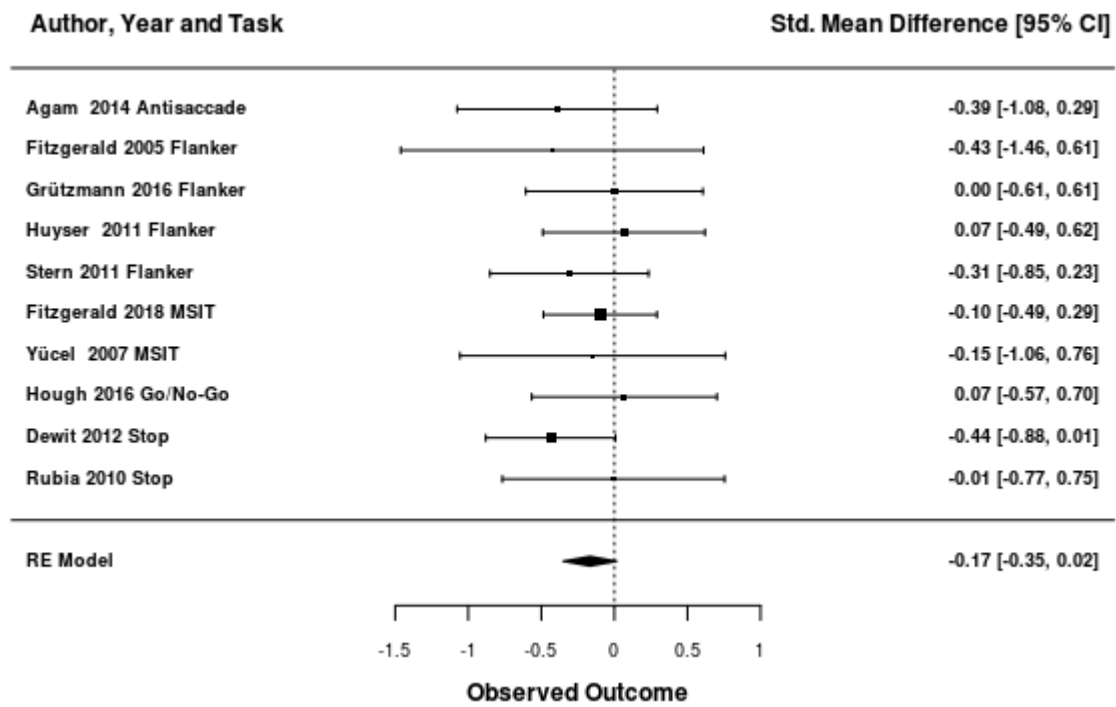

Supplementary Figure S10. Forest plot with standardized mean differences in brain activation during errors in R MTL (MNI x,y,z = 50,-4,-20) between patients with OCD and HC. CI, confidence interval; Std., Standardized.

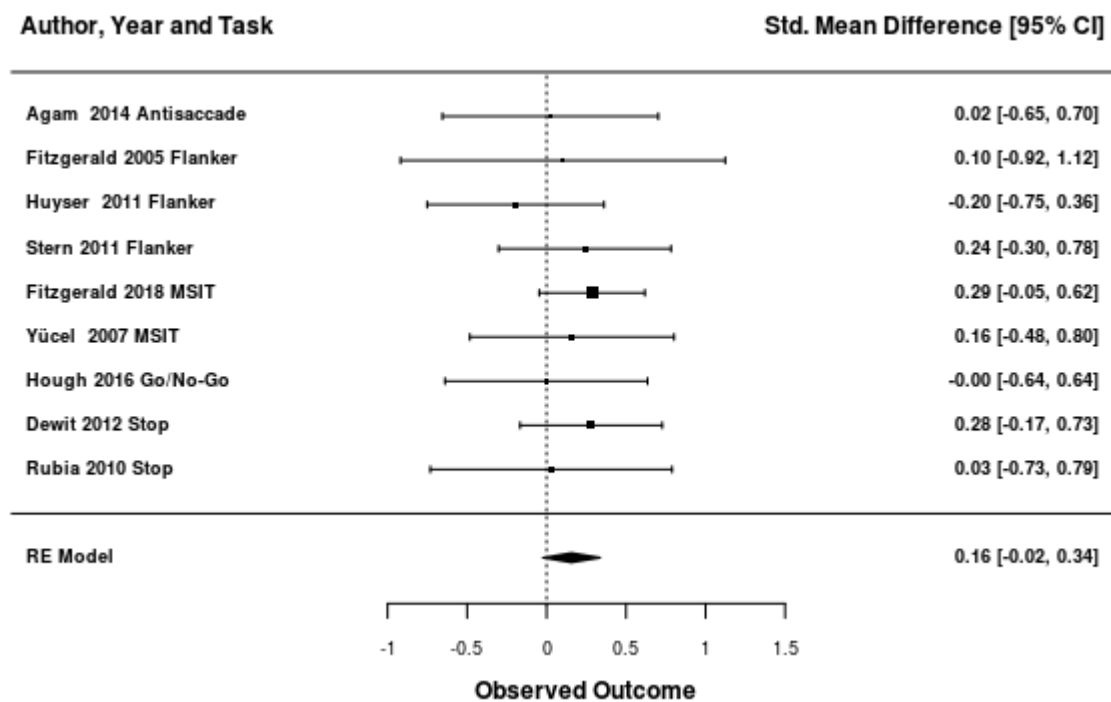

Supplementary Figure S11. Forest plot with standardized mean differences in brain activation during inhibitory control in left premotor cortex (MNI x,y,z = -26,0,60) between patients with OCD and HC. CI, confidence interval; Std., Standardized. Positive effect sizes indicate greater activation in OCD relative to HC.

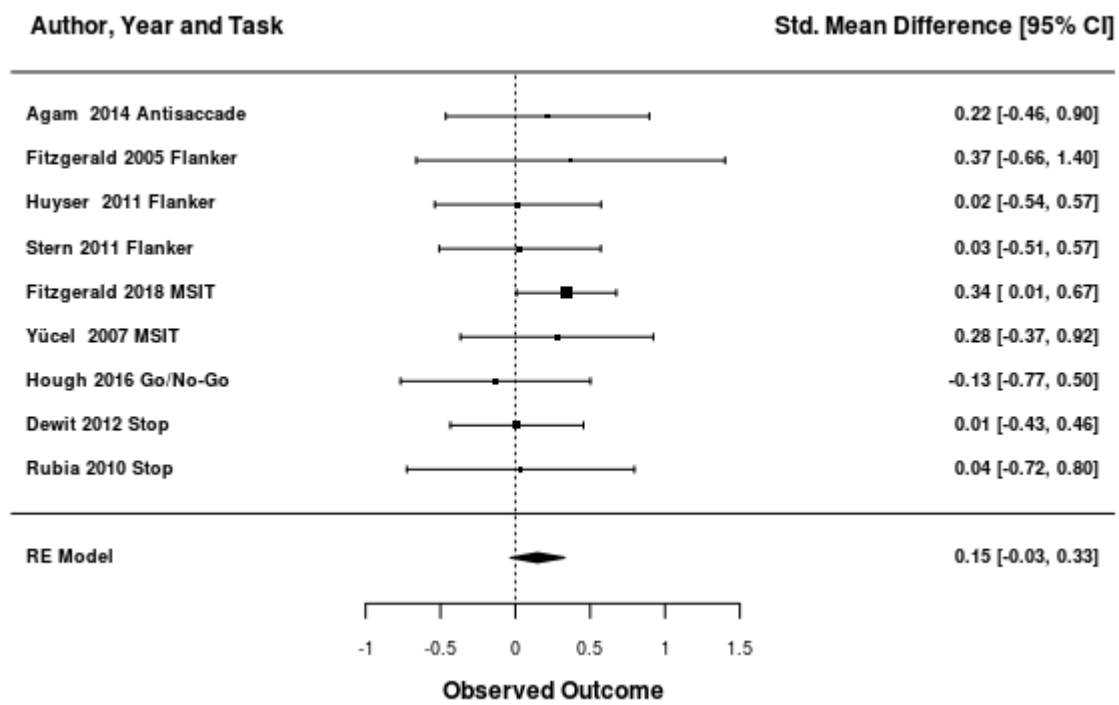

Supplementary Figure S12. Forest plot with standardized mean differences in brain activation during inhibitory control in right premotor cortex (MNI x,y,z = 30,-6,52) between patients with OCD and HC. CI, confidence interval; Std., Standardized. Positive effect sizes indicate greater activation in OCD relative to HC.



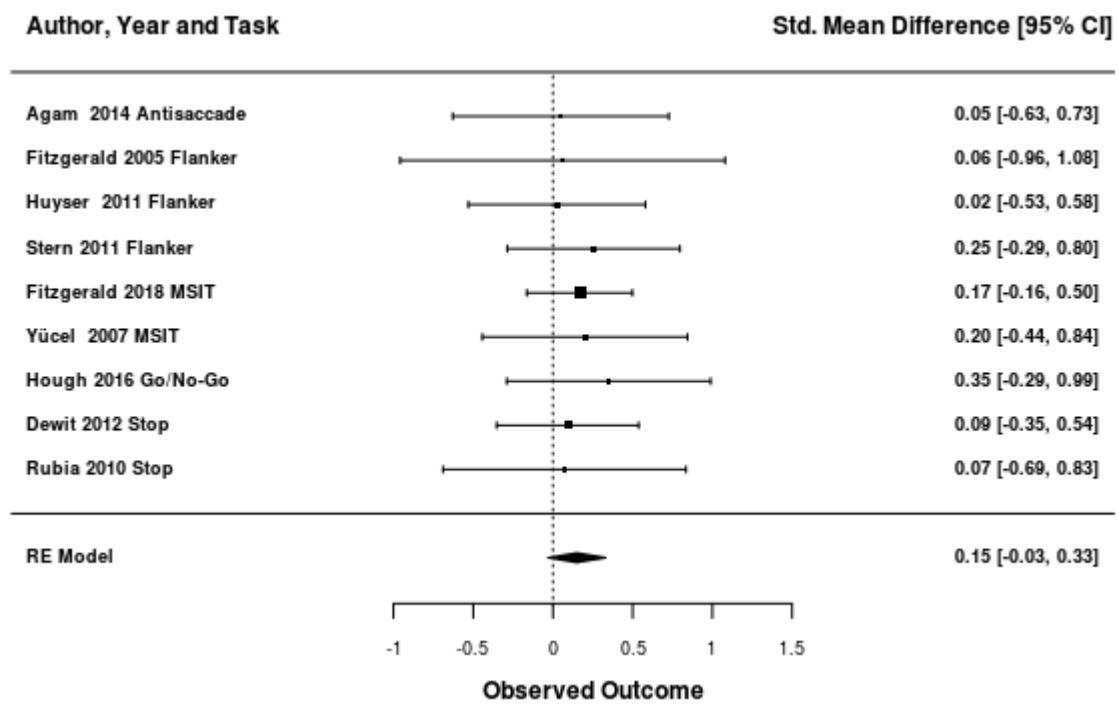

Supplementary Figure S13. Forest plot with standardized mean differences in brain activation during inhibitory control in right ITL/occipital lobe (MNI x,y,z = 48,-54,-10) between patients with OCD and HC. CI, confidence interval; Std., Standardized. Positive effect sizes indicate greater activation in OCD relative to HC.

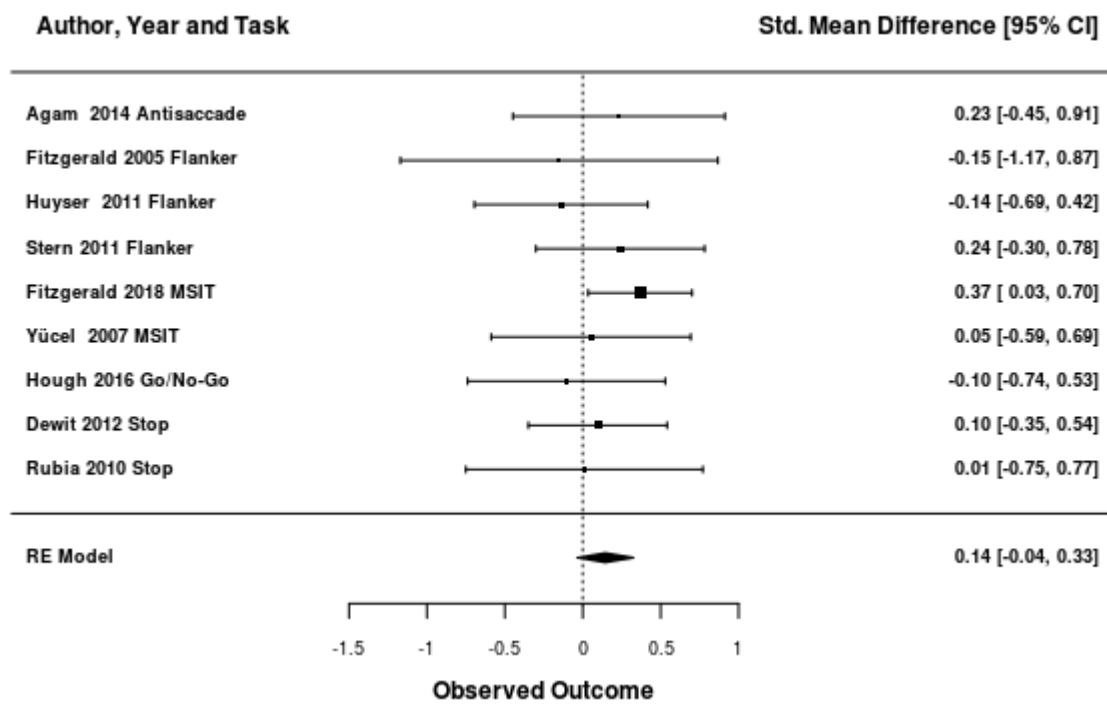

Supplementary Figure S14. Forest plot with standardized mean differences in brain activation during inhibitory control in right SPL (MNI x,y,z = 28,-52,56) between patients with OCD and HC. CI, confidence interval; Std., Standardized. Positive effect sizes indicate greater activation in OCD relative to HC.

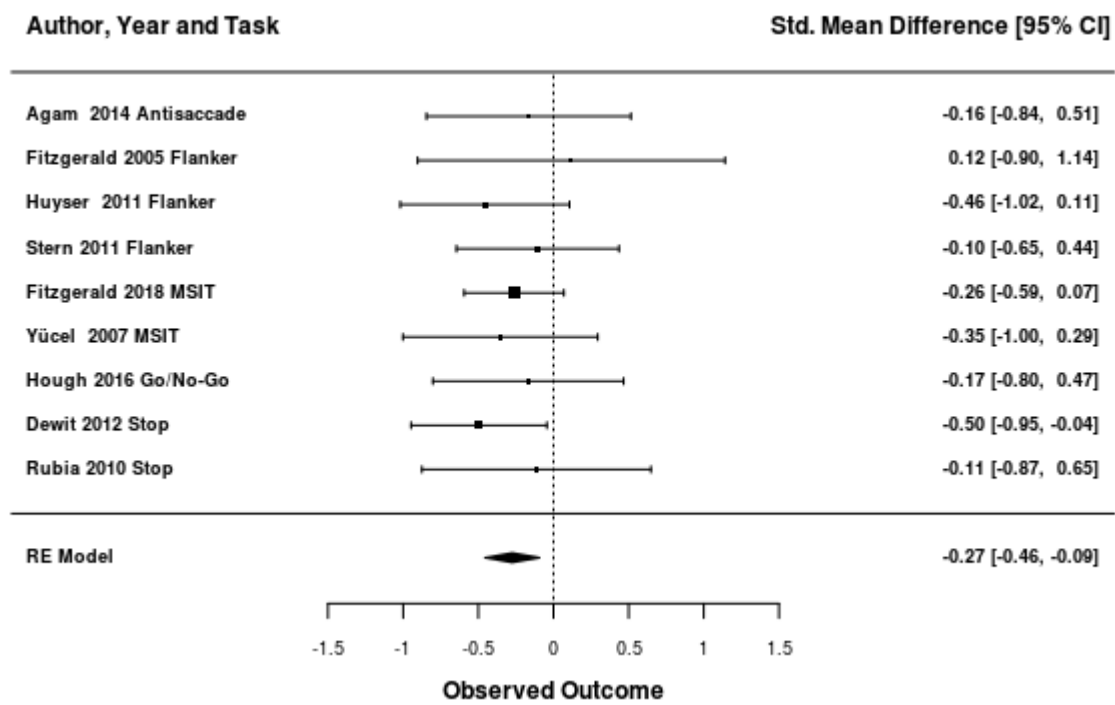

Supplementary Figure S15. Forest plot with standardized mean differences in brain activation during inhibitory control in left and right thalamus, left caudate (MNI x,y,z = -16,6,22) between patients with OCD and HC. CI, confidence interval; Std., Standardized. Positive effect sizes indicate greater activation in OCD relative to HC.

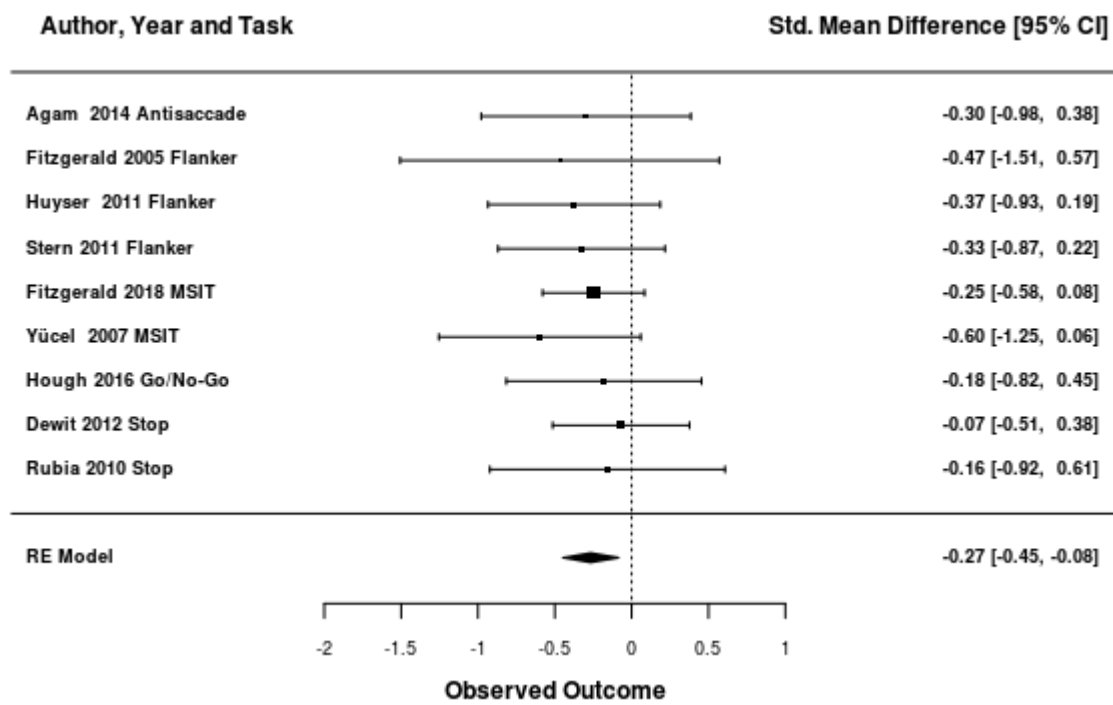

Supplementary Figure S16. Forest plot with standardized mean differences in brain activation during inhibitory control in left and right ACC/rACC/vACC (MNI x,y,z = 14,42,12) between patients with OCD and HC. CI, confidence interval; Std., Standardized. Positive effect sizes indicate greater activation in OCD relative to HC.

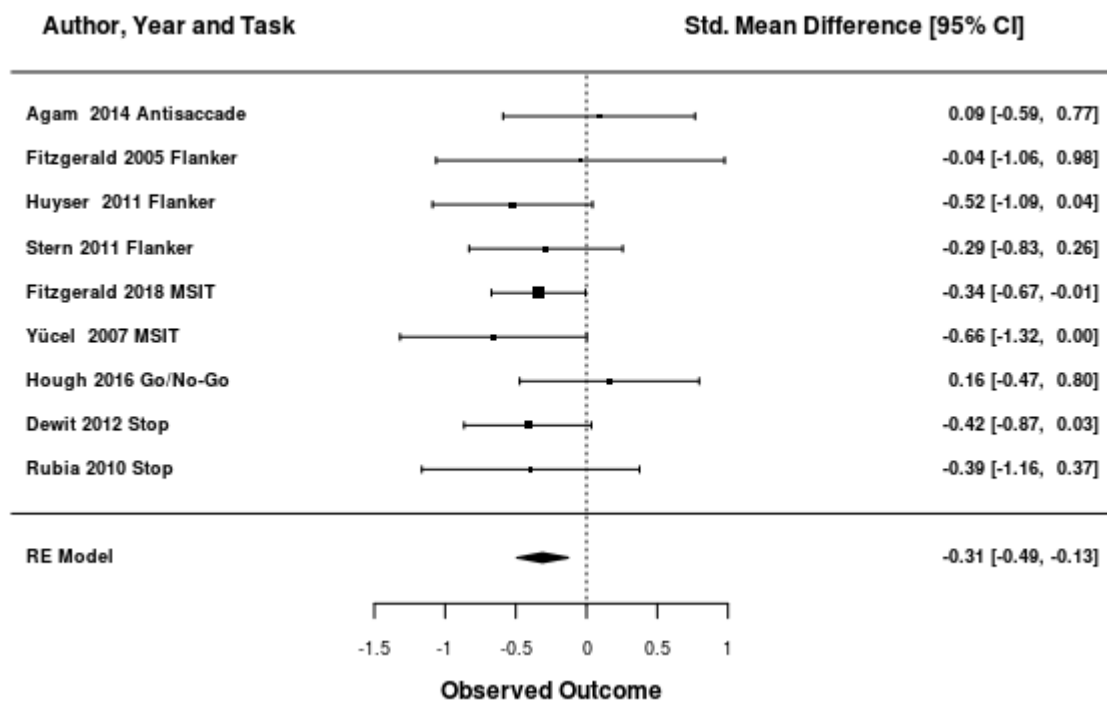

Supplementary Figure S17. Forest plot with standardized mean differences in brain activation during inhibitory control in right occipital lobe (MNI x,y,z = 26,-54,2) between patients with OCD and HC. CI, confidence interval; Std., Standardized. Positive effect sizes indicate greater activation in OCD relative to HC.

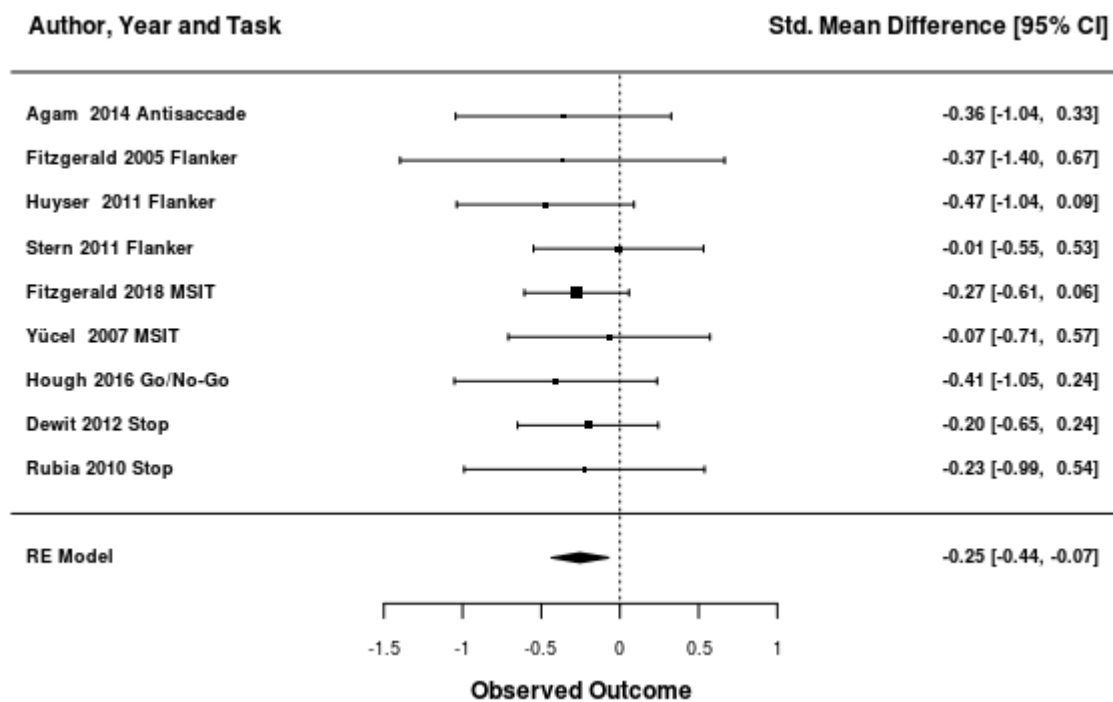

Supplementary Figure S18. Forest plot with standardized mean differences in brain activation during inhibitory control in right SMG/angular gyrus (MNI x,y,z = 56,-44,30) between patients with OCD and HC. CI, confidence interval; Std., Standardized. Positive effect sizes indicate greater activation in OCD relative to HC.

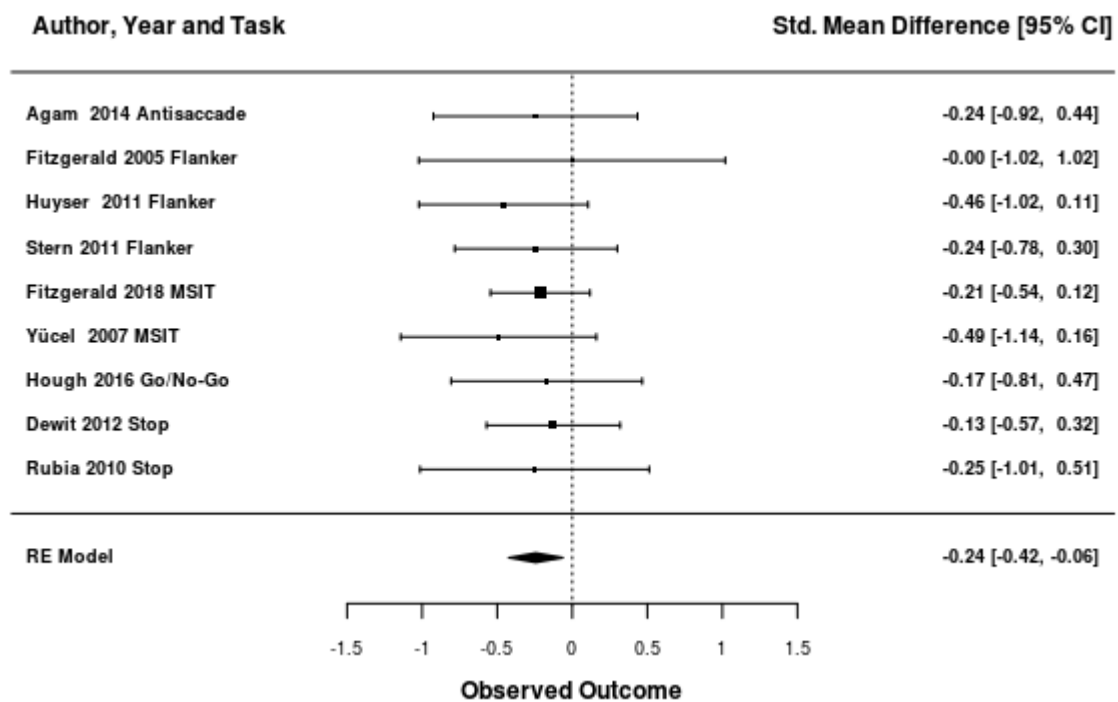

Supplementary Figure S19. Forest plot with standardized mean differences in brain activation during inhibitory control in left occipital lobe/cerebellum (MNI x,y,z = -28,-46,-8) between patients with OCD and HC. CI, confidence interval; Std., Standardized. Positive effect sizes indicate greater activation in OCD relative to HC.

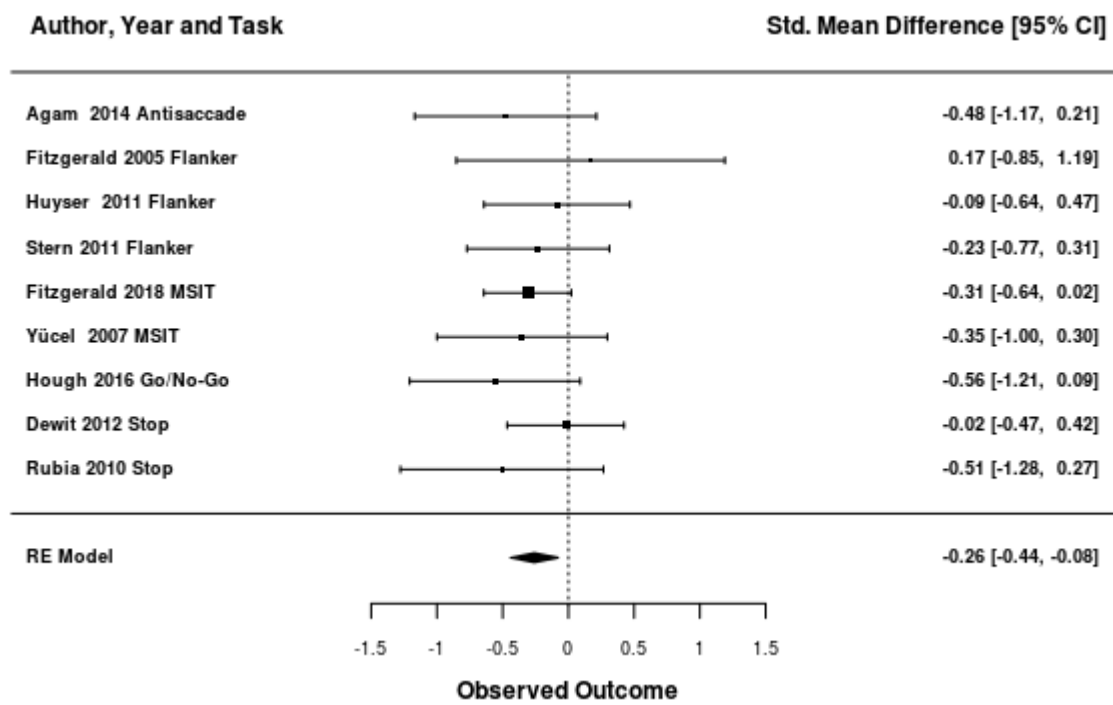

Supplementary Figure S20. Forest plot with standardized mean differences in brain activation during inhibitory control in right mOFC (MNI x,y,z = 20,36,-18) between patients with OCD and HC. CI, confidence interval; Std., Standardized. Positive effect sizes indicate greater activation in OCD relative to HC.





Supplementary Figure S21. Forest plot with standardized mean differences in brain activation during inhibitory control in right caudate (MNI x,y,z = 18,-12,22) between patients with OCD and HC. CI, confidence interval; Std., Standardized. Positive effect sizes indicate greater activation in OCD relative to HC.

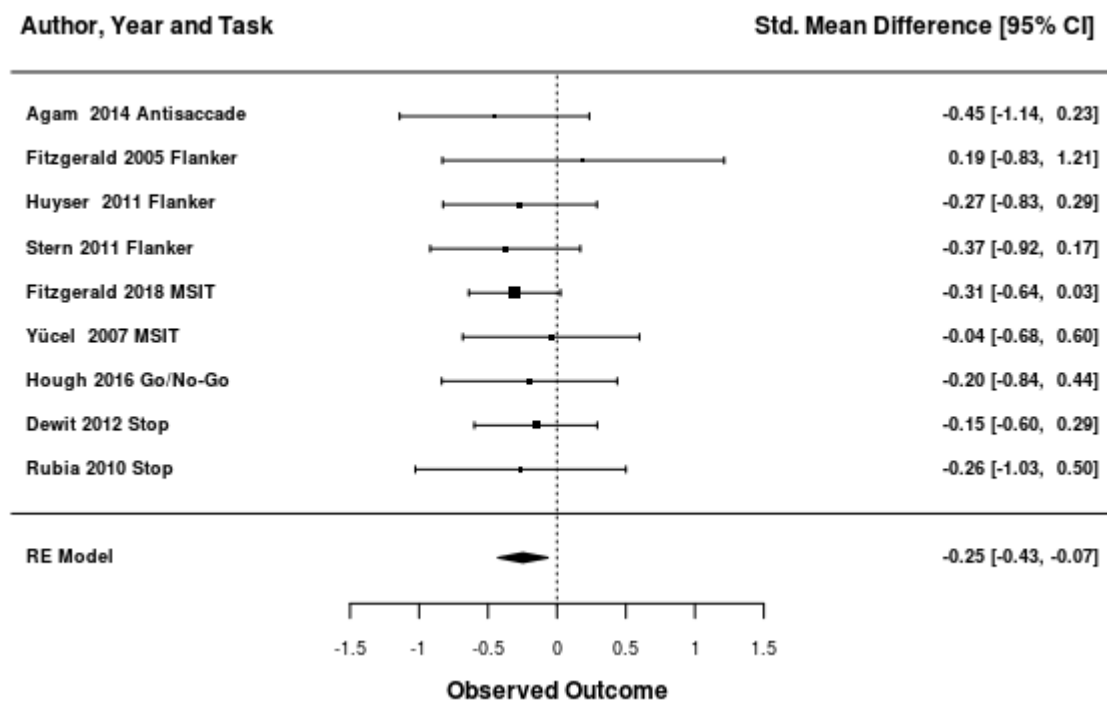

Supplementary Figure S22. Forest plot with standardized mean differences in brain activation during inhibitory control in R aI/fO/STL (MNI x,y,z = 48,18,4) between patients with OCD and HC. CI, confidence interval; Std., Standardized. Positive effect sizes indicate greater activation in OCD relative to HC.

**Supplementary Table S6. Results of the reliability (jackknife) analyses for areas showing increased activation in patients with OCD relative to HC during error processing.**

|              | R al/fO | R aLPFC | L & R<br>pre-SMA | L & R<br>dACC/SMA |
|--------------|---------|---------|------------------|-------------------|
| <b>Study</b> |         |         |                  |                   |
| Agam         | y       | y       | y                | y                 |
| de Wit       | y       | y       | y                | y                 |
| Fitzgerald   | y       | y       | n                | y                 |
| Fitzgerald   | y       | y       | n                | y                 |
| Grutzmann    | y       | y       | y                | y                 |
| Hough        | y       | y       | n                | y                 |
| Huyser       | y       | y       | y                | y                 |
| Rubia        | y       | y       | y                | y                 |
| Stern        | y       | y       | n                | y                 |
| Yücel        | y       | y       | n                | y                 |

y = brain region remains significant in the analysis; n = brain region is no longer significant in this analysis.

*Abbreviations: al, anterior insula; aLPFC, anterior lateral prefrontal cortex; dACC, dorsal anterior cingulate cortex; fO, frontal operculum; MNI, Montreal Neurological Institute; pre-SMA, pre-supplementary motor area; SMA, supplementary motor area.*

**Supplementary Table S7. Results of the reliability (jackknife) analyses for areas showing decreased activation in patients with OCD relative to HC during error processing.**

|            | L & R<br>occipital lobe | R MTL |
|------------|-------------------------|-------|
| Study      |                         |       |
| Agam       | y                       | y     |
| de Wit     | y                       | n     |
| Fitzgerald | y                       | y     |
| Fitzgerald | y                       | y     |
| Grutzmann  | y                       | y     |
| Hough      | y                       | y     |
| Huyser     | y                       | y     |
| Rubia      | y                       | y     |
| Stern      | y                       | n     |
| Yücel      | y                       | y     |

y = brain region remains significant in the analysis; n = brain region is no longer significant in this analysis.

*Abbreviations; MTL, middle temporal lobe.*

**Supplementary Table S8. Results of the reliability (jackknife) analyses for areas showing increased activation in patients with OCD relative to HC during inhibitory control.**

|              | L<br>premotor<br>cortex | R<br>premotor<br>cortex | R ITL/<br>occipital<br>lobe | R SPL |
|--------------|-------------------------|-------------------------|-----------------------------|-------|
| <b>Study</b> |                         |                         |                             |       |
| Agam         | y                       | y                       | y                           | n     |
| de Wit       | y                       | y                       | y                           | y     |
| Fitzgerald   | n                       | n                       | n                           | n     |
| Fitzgerald   | y                       | y                       | y                           | y     |
| Hough        | y                       | y                       | n                           | y     |
| Huyser       | y                       | y                       | y                           | y     |
| Rubia        | y                       | y                       | y                           | y     |
| Stern        | y                       | y                       | n                           | n     |
| Yücel        | y                       | y                       | y                           | y     |

y = brain region remains significant in the analysis; n = brain region is no longer significant in this analysis.

*Abbreviations: ITL, inferior temporal lobe; SPL, superior parietal lobe.*

**Supplementary Table S9. Results of the reliability (jackknife) analyses for areas showing decreased activation in patients with OCD relative to HC during inhibitory control.**

|            | L & R<br>thalamus,<br>R caudate | L & R<br>rACC<br>/vACC | R occipital<br>lobe | R SMG/<br>angular<br>gyrus | L occipital<br>lobe/<br>cerebellum | R mOFC | R caudate | R al/fO/<br>STL |
|------------|---------------------------------|------------------------|---------------------|----------------------------|------------------------------------|--------|-----------|-----------------|
| Study      |                                 |                        |                     |                            |                                    |        |           |                 |
| Agam       | y                               | y                      | y                   | y                          | y                                  | y      | y         | n               |
| de Wit     | y                               | y                      | y                   | y                          | y                                  | y      | n         | y               |
| Fitzgerald | y                               | y                      | y                   | y                          | n                                  | n      | n         | n               |
| Fitzgerald | y                               | y                      | y                   | y                          | y                                  | y      | y         | y               |
| Hough      | y                               | y                      | y                   | y                          | y                                  | n      | y         | y               |
| Huyser     | y                               | y                      | y                   | y                          | y                                  | y      | y         | y               |
| Rubia      | y                               | y                      | y                   | y                          | y                                  | y      | y         | y               |
| Stern      | y                               | y                      | y                   | y                          | y                                  | n      | y         | n               |
| Yücel      | y                               | y                      | y                   | y                          | n                                  | y      | y         | y               |

y = brain region remains significant in the analysis; n = brain region is no longer significant in this analysis.

*Abbreviations: al, anterior insula; fO, frontal operculum; mOFC, medial orbitofrontal cortex; rACC, rostral anterior cingulate cortex; SMG, supramarginal gyrus; STL, superior temporal lobe; vACC, ventral anterior cingulate cortex.*

## Supplementary References

1. Stern ER, Welsh RC, Fitzgerald KD, Gehring WJ, Lister JJ, Himle JA, *et al.* (2011): Hyperactive error responses and altered connectivity in ventromedial and frontoinsular cortices in obsessive-compulsive disorder. *Biol Psychiatry*. 69: 583–591.
2. Fitzgerald KD, Welsh RC, Gehring WJ, Abelson JL, Himle JA, Liberzon I, Taylor SF (2005): Error-related hyperactivity of the anterior cingulate cortex in obsessive-compulsive disorder. *Biol Psychiatry*. 57: 287–294.
3. Huyser C, Veltman DJ, Wolters LH, de Haan E, Boer F (2011): Developmental aspects of error and high-conflict-related brain activity in pediatric obsessive-compulsive disorder: a fMRI study with a Flanker task before and after CBT. *J Child Psychol Psychiatry*. 52: 1251–1260.
4. de Wit SJ, de Vries FE, van der Werf YD, Cath DC, Heslenfeld DJ, Veltman EM, *et al.* (2012): Presupplementary motor area hyperactivity during response inhibition: a candidate endophenotype of obsessive-compulsive disorder. *Am J Psychiatry*. 169: 1100–1108.
5. Yucel M, Harrison BJ, Wood SJ, Fornito A, Wellard RM, Pujol J, *et al.* (2007): Functional and biochemical alterations of the medial frontal cortex in obsessive-compulsive disorder. *Arch Gen Psychiatry*. 64: 946–955.
6. Rubia K, Cubillo A, Smith AB, Woolley J, Heyman I, Brammer MJ (2010): Disorder-specific dysfunction in right inferior prefrontal cortex during two inhibition tasks in boys with attention-deficit hyperactivity disorder compared to boys with obsessive-compulsive disorder. *Hum Brain Mapp*. 31: 287–299.

7. Agam Y, Greenberg JL, Isom M, Falkenstein MJ, Jenike E, Wilhelm S, Manoach DS (2014): Aberrant error processing in relation to symptom severity in obsessive-compulsive disorder: A multimodal neuroimaging study. *NeuroImage Clin.* 5: 141–151.
8. Fitzgerald KD, Liu Y, Johnson T, Moser J, Marsh R, Hanna GL, Taylor SF (2018): Development of posterior medial frontal cortex function in pediatric obsessive-compulsive disorder. *J Am Acad Child Adolesc Psychiatry.* 57: 397–406.
9. Hough CM, Luks TL, Lai K, Vigil O, Guillory S, Nongpiur A, *et al.* (2016): Comparison of brain activation patterns during executive function tasks in hoarding disorder and non-hoarding OCD. *Psychiatry Res.* 255: 50–59.
10. Grutzmann R, Endrass T, Kaufmann C, Allen E, Eichele T, Kathmann N (2016): Presupplementary Motor Area Contributes to Altered Error Monitoring in Obsessive-Compulsive Disorder. *Biol Psychiatry.* 80: 562–571.
11. Hedges L, Olkin I (1985): *Statistical Methods for Meta-Analysis*. Orlando, Florida: Academic Press.
12. Radua J, Mataix-Cols D, Phillips ML, El-Hage W, Kronhaus DM, Cardoner N, Surguladze S (2012): A new meta-analytic method for neuroimaging studies that combines reported peak coordinates and statistical parametric maps. *Eur Psychiatry J Assoc Eur Psychiatr.* 27: 605–611.
13. Radua J, Rubia K, Canales-Rodriguez EJ, Pomarol-Clotet E, Fusar-Poli P, Mataix-Cols D (2014): Anisotropic kernels for coordinate-based meta-analyses of neuroimaging studies. *Front Psychiatry.* 5: 13.
14. Radua J, Mataix-Cols D (2009): Voxel-wise meta-analysis of grey matter changes in obsessive-compulsive disorder. *Br J Psychiatry J Ment Sci.* 195: 393–402.



15. Norman LJ, Carlisi C, Lukito S, Hart H, Mataix-Cols D, Radua J, Rubia K (2016): Structural and functional brain abnormalities in attention-deficit/hyperactivity disorder and obsessive-compulsive disorder: A comparative meta-analysis. *JAMA Psychiatry*. 73: 815–825.
16. Carlisi CO, Norman LJ, Lukito SS, Radua J, Mataix-Cols D, Rubia K (2017): Comparative multimodal meta-analysis of structural and functional brain abnormalities in autism spectrum disorder and obsessive-compulsive disorder. *Biol Psychiatry*. 82: 83–102.
17. Wise T, Radua J, Via E, Cardoner N, Abe O, Adams TM, *et al.* (2016): Common and distinct patterns of grey-matter volume alteration in major depression and bipolar disorder: evidence from voxel-based meta-analysis. *Mol Psychiatry*. 22: 1455.
18. Luijten M, Schellekens AF, Kuhn S, Machielse MWJ, Sescousse G (2017): Disruption of reward processing in addiction: An image-based meta-analysis of functional magnetic resonance imaging studies. *JAMA Psychiatry*. 74: 387–398.
19. Fullana MA, Harrison BJ, Soriano-Mas C, Vervliet B, Cardoner N, Àvila-Parcet A, Radua J (2015): Neural signatures of human fear conditioning: an updated and extended meta-analysis of fMRI studies. *Mol Psychiatry*. 21: 500.
20. Gabay AS, Radua J, Kempton MJ, Mehta MA (2014): The Ultimatum Game and the brain: A meta-analysis of neuroimaging studies. *Neurosci Biobehav Rev*. 47: 549–558.
21. Beucke JC, Sepulcre J, Talukdar T, Linnman C, Zschenderlein K, Endrass T, *et al.* (2013): Abnormally high degree connectivity of the orbitofrontal cortex in obsessive-compulsive disorder. *JAMA Psychiatry*. 70: 619–629.
22. Chamberlain SR, Fineberg NA, Menzies LA, Blackwell AD, Bullmore ET, Robbins TW, Sahakian BJ (2007): Impaired cognitive flexibility and motor inhibition in unaffected

- first-degree relatives of patients with obsessive-compulsive disorder. *Am J Psychiatry*. 164: 335–338.
23. Cheng Y, Xu J, Nie B, Luo C, Yang T, Li H, *et al.* (2013): Abnormal resting-state activities and functional connectivities of the anterior and the posterior cortexes in medication-naive patients with obsessive-compulsive disorder. *PLoS One*. 8: e67478.
24. Damiou A, Apostolakis S, Thrapsanioti E, Theleritis C, Smyrnis N (2016): Shared and distinct oculomotor function deficits in schizophrenia and obsessive compulsive disorder. *Psychophysiology*. 53: 796–805.
25. Gadad A, Reddy DY, Venkatasubramanian DG, C.N DJ (2017): Neuroimaging correlates of insight in obsessive compulsive disorder: A fMRI study. *Abstr 25th Eur Congr Psychiatry*. 41: S409.
26. Jung K, Ku J, Kim SJ, Lee H, Kim KR, An SK, *et al.* (2014): Distinct functional connectivity of limbic network in the washing type obsessive-compulsive disorder. *Prog Neuropsychopharmacol Biol Psychiatry*. 53: 149–155.
27. Kocak OM, Ozpolat AY, Atbasoglu C, Cicek M (2011): Cognitive control of a simple mental image in patients with obsessive-compulsive disorder. *Brain Cogn*. 76: 390–399.
28. Lennertz L, Rampacher F, Vogeley A, Schulze-Rauschenbach S, Pukrop R, Ruhrmann S, *et al.* (2012): Antisaccade performance in patients with obsessive-compulsive disorder and unaffected relatives: further evidence for impaired response inhibition as a candidate endophenotype. *Eur Arch Psychiatry Clin Neurosci*. 262: 625–634.
29. Meunier D, Ersche KD, Craig KJ, Fornito A, Merlo-Pich E, Fineberg NA, *et al.* (2012): Brain functional connectivity in stimulant drug dependence and obsessive-compulsive disorder. *NeuroImage*. 59: 1461–1468.

30. Morris LS, Baek K, Voon V (2017): Distinct cortico-striatal connections with subthalamic nucleus underlie facets of compulsivity. *Cortex J Devoted Study Nerv Syst Behav.* 88: 143–150.
31. Murayama K, Nakao T, Sanematsu H, Okada K, Yoshiura T, Tomita M, *et al.* (2013): Differential neural network of checking versus washing symptoms in obsessive-compulsive disorder. *Prog Neuropsychopharmacol Biol Psychiatry.* 40: 160–166.
32. Peles E, Weinstein A, Sason A, Adelson M, Schreiber S (2014): Stroop task among patients with obsessive-compulsive disorder (OCD) and pathological gambling (PG) in methadone maintenance treatment (MMT). *CNS Spectr.* 19: 509–518.
33. Remijnse PL, van den Heuvel OA, Nielen MMA, Vriend C, Hendriks G-J, Hoogendijk WJG, *et al.* (2013): Cognitive inflexibility in obsessive-compulsive disorder and major depression is associated with distinct neural correlates. *PloS One.* 8: e59600.
34. Riesel A, Endrass T, Auerbach LA, Kathmann N (2015): Overactive performance monitoring as an endophenotype for obsessive-compulsive disorder: Evidence from a treatment study. *Am J Psychiatry.* 172: 665–673.
35. Waters AM, Farrell LJ (2014): Response inhibition to emotional faces in childhood obsessive-compulsive disorder. *J Obsessive-Compuls Relat Disord.* 3: 65–70.
36. Britton JC, Rauch SL, Rosso IM, Killgore WDS, Price LM, Ragan J, *et al.* (2010): Cognitive inflexibility and frontal-cortical activation in pediatric obsessive-compulsive disorder. *J Am Acad Child Adolesc Psychiatry.* 49: 944–953.
37. Berlin HA, Schulz KP, Zhang S, Turetzky R, Rosenthal D, Goodman W (2015): Neural correlates of emotional response inhibition in obsessive-compulsive disorder: A preliminary study. *Psychiatry Res.* 234: 259–264.

38. Brennan BP, Schwab ZJ, Athey AJ, Ryan EM, Killgore WD, Jenike MA, Rauch SL (2013): A functional magnetic resonance imaging study of rostral anterior cingulate cortex activation in obsessive-compulsive disorder using an emotional counting stroop paradigm. *Biol Psychiatry*. (Vol. 73), pp 74S-74S.
39. Brennan BP, Tkachenko O, Schwab ZJ, Juelich RJ, Ryan EM, Athey AJ, *et al.* (2015): An examination of rostral anterior cingulate cortex function and neurochemistry in obsessive-compulsive disorder. *Neuropsychopharmacol Off Publ Am Coll Neuropsychopharmacol*. 40: 1866–1876.
40. Gillan CM, Apergis-Schoute AM, Morein-Zamir S, Urcelay GP, Sule A, Fineberg NA, *et al.* (2015): Functional neuroimaging of avoidance habits in obsessive-compulsive disorder. *Am J Psychiatry*. 172: 284–293.
41. Gu B-M, Park J-Y, Kang D-H, Lee SJ, Yoo SY, Jo HJ, *et al.* (2008): Neural correlates of cognitive inflexibility during task-switching in obsessive-compulsive disorder. *Brain J Neurol*. 131: 155–164.
42. Hauser TU, Iannaccone R, Dolan RJ, Ball J, Hattenschwiler J, Drechsler R, *et al.* (2017): Increased fronto-striatal reward prediction errors moderate decision making in obsessive-compulsive disorder. *Psychol Med*. 47: 1246–1258.
43. Jung WH, Kang D-H, Han JY, Jang JH, Gu B-M, Choi J-S, *et al.* (2011): Aberrant ventral striatal responses during incentive processing in unmedicated patients with obsessive-compulsive disorder. *Acta Psychiatr Scand*. 123: 376–386.
44. Koch K, Wagner G, Schachtzabel C, Peikert G, Schultz CC, Sauer H, Schlosser RG (2012): Aberrant anterior cingulate activation in obsessive-compulsive disorder is related to task complexity. *Neuropsychologia*. 50: 958–964.

45. Narayanaswamy JC, Jose D, Agarwal SM, Kalmady SV, Baruah U, Shivakumar V, *et al.* (2017): Neuro-hemodynamic endophenotypes of emotional interference in OCD: Study using emotion counting Stroop task. *Eur Neuropsychopharmacol.* 27: 614.
46. Rotge J-Y, Langbour N, Dilharreguy B, Bordessoulles M, Guehl D, Bioulac B, *et al.* (2015): Contextual and behavioral influences on uncertainty in obsessive-compulsive disorder. *Cortex J Devoted Study Nerv Syst Behav.* 62: 1–10.
47. Vriend C, de Wit SJ, Remijnse PL, van Balkom AJLM, Veltman DJ, van den Heuvel OA (2013): Switch the itch: a naturalistic follow-up study on the neural correlates of cognitive flexibility in obsessive-compulsive disorder. *Psychiatry Res.* 213: 31–38.
48. Weidt S, Lutz J, Rufer M, Delsignore A, Jakob NJ, Herwig U, Bruehl AB (2016): Common and differential alterations of general emotion processing in obsessive-compulsive and social anxiety disorder. *Psychol Med.* 46: 1427–1436.
49. Brem S, Hauser TU, Iannaccone R, Brandeis D, Drechsler R, Walitza S (2012): Neuroimaging of cognitive brain function in paediatric obsessive compulsive disorder: a review of literature and preliminary meta-analysis. *J Neural Transm Vienna Austria 1996.* 119: 1425–1448.
50. Fitzgerald KD, Taylor SF (2015): Error-processing abnormalities in pediatric anxiety and obsessive compulsive disorders. *CNS Spectr.* 20: 346–354.
51. Manoach DS, Agam Y (2013): Neural markers of errors as endophenotypes in neuropsychiatric disorders. *Front Hum Neurosci.* 7: 350.
52. McGovern RA, Sheth SA (2017): Role of the dorsal anterior cingulate cortex in obsessive-compulsive disorder: converging evidence from cognitive neuroscience and psychiatric neurosurgery. *J Neurosurg.* 126: 132–147.

53. McTeague LM, Goodkind MS, Etkin A (2016): Transdiagnostic impairment of cognitive control in mental illness. *J Psychiatr Res.* 83: 37–46.
54. Melcher T, Falkai P, Gruber O (2008): Functional brain abnormalities in psychiatric disorders: neural mechanisms to detect and resolve cognitive conflict and interference. *Brain Res Rev.* 59: 96–124.
55. Melloni M, Urbistondo C, Sedeno L, Gelormini C, Kichic R, Ibanez A (2012): The extended fronto-striatal model of obsessive compulsive disorder: convergence from event-related potentials, neuropsychology and neuroimaging. *Front Hum Neurosci.* 6: 259.
56. Milad MR, Rauch SL (2012): Obsessive-compulsive disorder: beyond segregated cortico-striatal pathways. *Trends Cogn Sci.* 16: 43–51.
57. Pena-Garijo J, Ruiperez-Rodriguez MA, Barros-Loscertales A (2010): [The neurobiology of obsessive-compulsive disorder: new findings from functional magnetic resonance imaging (II)]. *Rev Neurol.* 50: 541–550.
58. Pena-Garijo J, Ruiperez-Rodriguez MA, Barros-Loscertales A (2010): [The neurobiology of obsessive-compulsive disorder: new findings from functional magnetic resonance imaging (I)]. *Rev Neurol.* 50: 477–485.
59. van Velzen LS, Vriend C, de Wit SJ, van den Heuvel OA (2014): Response Inhibition and Interference Control in Obsessive–Compulsive Spectrum Disorders. *Front Hum Neurosci.* 8: 419.
60. Ullsperger M (2006): Performance monitoring in neurological and psychiatric patients. *Int J Psychophysiol Off J Int Organ Psychophysiol.* 59: 59–69.
61. Fitzgerald KD, Liu Y, Stern ER, Welsh RC, Hanna GL, Monk CS, *et al.* (2013): Reduced error-related activation of dorsolateral prefrontal cortex across pediatric anxiety disorders. *J Am Acad Child Adolesc Psychiatry.* 52: 1183-1191.e1.

62. Rubia K, Cubillo A, Woolley J, Halari R, Smith A, Brammer M (2009): P01-04 Disorder-specific right inferior prefrontal dysfunction during two tasks of inhibitory control in pediatric attention-deficit/hyperactivity disorder compared to pediatric obsessive-compulsive disorder. *17th EPA Congr - Lisbon Port January 2009 Abstr Book*. 24: S392.
63. Woolley J, Heyman I, Brammer M, Frampton I, McGuire PK, Rubia K (2008): Brain activation in paediatric obsessive compulsive disorder during tasks of inhibitory control. *Br J Psychiatry J Ment Sci*. 192: 25–31.
64. Fitzgerald KD, Stern ER, Angstadt M, Nicholson-Muth K, Maynor M, Welsh RC, *et al.* (2010): Altered function and connectivity of the medial frontal cortex in pediatric obsessive compulsive disorder. *Biol Psychiatry*. 68: 1039–1047.
65. van Velzen LS, de Wit SJ, Curcic-Blake B, Cath DC, de Vries FE, Veltman DJ, *et al.* (2015): Altered inhibition-related frontolimbic connectivity in obsessive-compulsive disorder. *Hum Brain Mapp*. 36: 4064–4075.
66. Ursu S, Stenger VA, Shear MK, Jones MR, Carter CS (2003): Overactive action monitoring in obsessive-compulsive disorder: evidence from functional magnetic resonance imaging. *Psychol Sci*. 14: 347–353.
67. Ursu S, Carter CS (2009): An initial investigation of the orbitofrontal cortex hyperactivity in obsessive-compulsive disorder: exaggerated representations of anticipated aversive events? *Neuropsychologia*. 47: 2145–2148.
68. Agam Y, Vangel M, Roffman JL, Gallagher PJ, Chaponis J, Haddad S, *et al.* (2014): Dissociable genetic contributions to error processing: a multimodal neuroimaging study. *PLoS One*. 9: e101784.
69. den Braber A, van 't Ent D, Cath DC, Veltman DJ, Boomsma DI, de Geus EJC (2012): Brain activation during response interference in twins discordant or concordant for

- obsessive compulsive symptoms. *Twin Res Hum Genet Off J Int Soc Twin Stud.* 15: 372–383.
70. Narayanaswamy JC, Jose D, Chhabra H, Agarwal SM, Shrinivasa B, Hegde A, *et al.* (2015): Successful application of add-on transcranial direct current stimulation (tDCS) for treatment of SSRI resistant OCD. *Brain Stimulat.* 8: 655–657.
71. Figeo M, Vink M, Luigjes J, van Wingen G, Denys D (2017): Deep brain stimulation modulates frontostriatal inhibitory control in obsessive-compulsive disorder. *72nd Annu Sci Conv Meet.* 81: S96–S97.
72. Nakao T, Nakagawa A, Yoshiura T, Nakatani E, Nabeyama M, Yoshizato C, *et al.* (2005): A functional MRI comparison of patients with obsessive-compulsive disorder and normal controls during a Chinese character Stroop task. *Psychiatry Res.* 139: 101–114.
73. Nabeyama M, Nakagawa A, Yoshiura T, Nakao T, Nakatani E, Togao O, *et al.* (2008): Functional MRI study of brain activation alterations in patients with obsessive-compulsive disorder after symptom improvement. *Psychiatry Res.* 163: 236–247.
74. Nakao T, Nakagawa A, Yoshiura T, Nakatani E, Nabeyama M, Yoshizato C, *et al.* (2005): Brain activation of patients with obsessive-compulsive disorder during neuropsychological and symptom provocation tasks before and after symptom improvement: A functional magnetic resonance imaging study. *Biol Psychiatry.* 57: 901–910.
75. Nakao T, Nakagawa A, Yoshiura T, Nakatani E, Nabeyama M, Sanematsu H, *et al.* (2009): Duration effect of obsessive-compulsive disorder on cognitive function: a functional MRI study. *Depress Anxiety.* 26: 814–823.



76. Hou JM, Li HT, Wu WJ, Qu W, Ran JF, Chen Y (2011): Functional MRI of brain dysfunction during Stroop task in obsessive compulsive disorder patients. *Chin J Med Imaging Technol.* 27: 1977–1980.
77. Marsh R, Horga G, Parashar N, Wang Z, Peterson BS, Simpson HB (2014): Altered activation in fronto-striatal circuits during sequential processing of conflict in unmedicated adults with obsessive-compulsive disorder. *Biol Psychiatry.* 75: 615–622.
78. Pena-Garijo J, Barros-Loscertales A, Ventura-Campos N, Ruiperez-Rodriguez MA, Edo-Villamon S, Avila C (2011): [Involvement of the thalamic-cortical-striatal circuit in patients with obsessive-compulsive disorder during an inhibitory control task with reward and punishment contingencies]. *Rev Neurol.* 53: 77–86.
79. Roth RM, Saykin AJ, Flashman LA, Pixley HS, West JD, Mamourian AC (2007): Event-related functional magnetic resonance imaging of response inhibition in obsessive-compulsive disorder. *Biol Psychiatry.* 62: 901–909.
80. Schlosser RGM, Wagner G, Schachtzabel C, Peikert G, Koch K, Reichenbach JR, Sauer H (2010): Fronto-cingulate effective connectivity in obsessive compulsive disorder: a study with fMRI and dynamic causal modeling. *Hum Brain Mapp.* 31: 1834–1850.
81. Viard A, Flament MF, Artiges E, Dehaene S, Naccache L, Cohen D, *et al.* (2005): Cognitive control in childhood-onset obsessive-compulsive disorder: a functional MRI study. *Psychol Med.* 35: 1007–1017.
82. Dehaene S, Artiges E, Naccache L, Martelli C, Viard A, Schurhoff F, *et al.* (2003): Conscious and subliminal conflicts in normal subjects and patients with schizophrenia: the role of the anterior cingulate. *Proc Natl Acad Sci U S A.* 100: 13722–13727.

83. Page LA, Rubia K, Deeley Q, Daly E, Toal F, Mataix-Cols D, *et al.* (2009): A functional magnetic resonance imaging study of inhibitory control in obsessive-compulsive disorder. *Psychiatry Res.* 174: 202–209.
84. Morein-Zamir S, Voon V, Dodds CM, Sule A, van Niekerk J, Sahakian BJ, Robbins TW (2016): Divergent subcortical activity for distinct executive functions: stopping and shifting in obsessive compulsive disorder. *Psychol Med.* 46: 829–840.
85. Kang D-H, Jang JH, Han JY, Kim J-H, Jung WH, Choi J-S, *et al.* (2013): Neural correlates of altered response inhibition and dysfunctional connectivity at rest in obsessive-compulsive disorder. *Prog Neuropsychopharmacol Biol Psychiatry.* 40: 340–346.
86. Maltby N, Tolin DF, Worhunsky P, O’Keefe TM, Kiehl KA (2005): Dysfunctional action monitoring hyperactivates frontal-striatal circuits in obsessive-compulsive disorder: an event-related fMRI study. *NeuroImage.* 24: 495–503.
87. Tolin DF, Witt ST, Stevens MC (2014): Hoarding disorder and obsessive-compulsive disorder show different patterns of neural activity during response inhibition. *Psychiatry Res.* 221: 142–148.
88. Silverman WK, Albano AM (1996): *The Anxiety Disorders Interview Schedule for Children for DSM-IV: Child and Parent Versions.* San Antonio, TX: The Psychological Corporation.
89. Kaufman J, Birmaher B, Brent D, Rao U, Flynn C, Moreci P, *et al.* (1997): Schedule for Affective Disorders and Schizophrenia for School-Age Children-Present and Lifetime Version (K-SADS-PL): initial reliability and validity data. *J Am Acad Child Adolesc Psychiatry.* 36: 980–988.
90. Goldberg DP, Murray R (2006): *The Maudsley Handbook of Practical Psychiatry.* New York: Oxford University Press.

91. First MB, Spitzer RL, Gibbon M, Williams JB (1995): *Structured clinical interview for DSM-IV axis I disorders*. New York: New York State Psychiatric Institute.
